# Supplementary material for: Precision design of stable genetic circuits carried in highly‐insulated E. coli genomic landing pads
Source: PubMed Central journal article supplement (PMC7436927; doi:10.15252/msb.20209584), 2020-08-19
Supplement: MSB-16-e9584-s001.pdf [file MSB-16-e9584-s001.pdf]

## Appendix for:

### Precision design of stable genetic circuits carried in highly-insulated *E. coli* genomic landing pads

Yongjin Park<sup>1</sup>, Amin Espah Borujeni<sup>1</sup>, Thomas E. Gorochowski<sup>1,2</sup>, Jonghyeon Shin<sup>1</sup> and Christopher A. Voigt<sup>1,2,\*</sup>

<sup>1</sup> Synthetic Biology Center, Department of Biological Engineering, Massachusetts Institute of Technology, Cambridge, MA 02139, USA

<sup>2</sup> Broad Institute of MIT and Harvard, Cambridge, MA 02139, USA

Figure 1. Terminator characterization assay.

Figure 2. Comparison of expression at different integration sites between *E. coli* strains.

Figure 3. Comparison of expression levels between landing pads.

Figure 4. Comparison between plasmid RPU and genome RPU<sub>G</sub> fluorescence levels.

Figure 5. Characterization of the sensor array at Landing Pad #1.

Figure 6. Genetic schematics for the genome-encoded NOT gates.

Figure 7. Optimization of NOT gates.

Figure 8. Growth impact of repressor expression from Landing Pad #1.

Figure 9. Example of a circuit designed using “tandem” NOR gates.

Figure 10. Replicate measurements are shown for the genetic circuits.

Figure 11. Cello-designed plasmid circuit for the 0xF1 logic operation.

Figure 12. Conversion of x-axis of response functions from [IPTG] to RPU<sub>G</sub>

Figure 13. Performance of genome- and plasmid- encoded circuits when passaged for two weeks.

Figure 14. Plasmid and genome constructs used in this study.

Note 1. Detailed protocol for inserting payloads into genome landing pads

Table 1. Double terminator sequences and strengths

Table 2. Transposon library results for *E. coli* DH10β

Table 3. ON/OFF levels for genome-encoded sensors

Table 4. Sequence of landing pads used in this study

Table 5. Sequence of genetic parts used in this study

Table 6. Sequence of plasmids used in this study

Table 7. Sequence of genome integrated constructs used In this study

Table 8. Strains used in this study

References

a

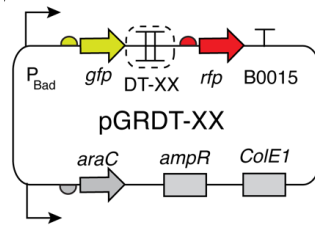

b

| Name  | Forward Terminator Strength |     |       |     |       |     | Reverse Terminator Strength |      |       |      |       |      |
|-------|-----------------------------|-----|-------|-----|-------|-----|-----------------------------|------|-------|------|-------|------|
|       | Day 1                       |     | Day 2 |     | Day 3 |     | Day 1                       |      | Day 2 |      | Day 3 |      |
|       | GFP                         | RFP | GFP   | RFP | GFP   | RFP | GFP                         | RFP  | GFP   | RFP  | GFP   | RFP  |
| DT3   | 4100                        | 0.4 | 3200  | 0.8 | 3100  | 0.8 | 3200                        | 8.4  | 2900  | 10   | 3600  | 14   |
| DT5   | 3100                        | 0.9 | 4600  | 0.4 | 3500  | 0.5 | 3600                        | 34   | 4700  | 51   | 3300  | 27   |
| DT19  | 3400                        | 2.0 | 2700  | 1.8 | 2200  | 1.5 | 2900                        | 1300 | 3200  | 1500 | 4100  | 1400 |
| DT34  | 4400                        | 3.6 | 3300  | 2.4 | 3200  | 3.2 | 2600                        | 950  | 3200  | 900  | 3800  | 1400 |
| DT36  | 3400                        | 2.5 | 3800  | 2.2 | 4500  | 3.8 | 3000                        | 390  | 2900  | 470  | 3300  | 510  |
| DT42  | 3200                        | 0.4 | 3900  | 1.4 | 3900  | 1.0 | 6700                        | 130  | 700   | 160  | 800   | 200  |
| DT54  | 3100                        | 0.6 | 3700  | 1.0 | 7700  | 2.7 | 3200                        | 55   | 3500  | 60   | 4200  | 52   |
| DT56  | 2700                        | 5.4 | 3400  | 6.5 | 3300  | 7.1 | 540                         | 20   | 560   | 26   | 660   | 41   |
| DT60  | 3400                        | 16  | 3200  | 14  | 4200  | 21  | 2900                        | 48   | 3600  | 53   | 3800  | 79   |
| DT65  | 2400                        | 2.6 | 1500  | 1.4 | 3000  | 5.4 | 2200                        | 1200 | 3000  | 1400 | 3100  | 1900 |
| DT82  | 2200                        | 6.3 | 1800  | 3.9 | 3000  | 11  | 2900                        | 500  | 3300  | 570  | 3500  | 720  |
| DT83  | 1800                        | 1.7 | 4200  | 5.9 | 9100  | 2.9 | 2100                        | 210  | 2700  | 310  | 3000  | 400  |
| DT86  | 4800                        | 11  | 2500  | 4.4 | 4000  | 12  | 3000                        | 3100 | 4000  | 4700 | 4100  | 5200 |
| DT100 | 5400                        | 0.7 | 4500  | 0.5 | 9500  | 1.7 | 2700                        | 120  | 3200  | 100  | 4100  | 180  |
| DT101 | 4100                        | 0.4 | 4600  | 0.7 | 3200  | 0.5 | 2900                        | 10   | 5000  | 13   | 5200  | 20   |
| DT103 | 3500                        | 2.2 | 3000  | 1.6 | 3500  | 3.0 | 2400                        | 260  | 3400  | 410  | 3200  | 500  |
| DT104 | 3200                        | 3.1 | 4400  | 4.9 | 3000  | 2.1 | 2400                        | 11   | 3700  | 17   | 3300  | 19   |

**Appendix Figure 1: Terminator characterization assay. (a)** The plasmid to measure terminator strength is shown, where XX refers to the terminator name. The terminator to be measured is inserted between *gfp* and *rfp* genes in an operon and the measured fluorescences are used to calculate terminator strength  $T_S$  (Methods). **(b)** The raw fluorescence measurements for each terminator are shown.

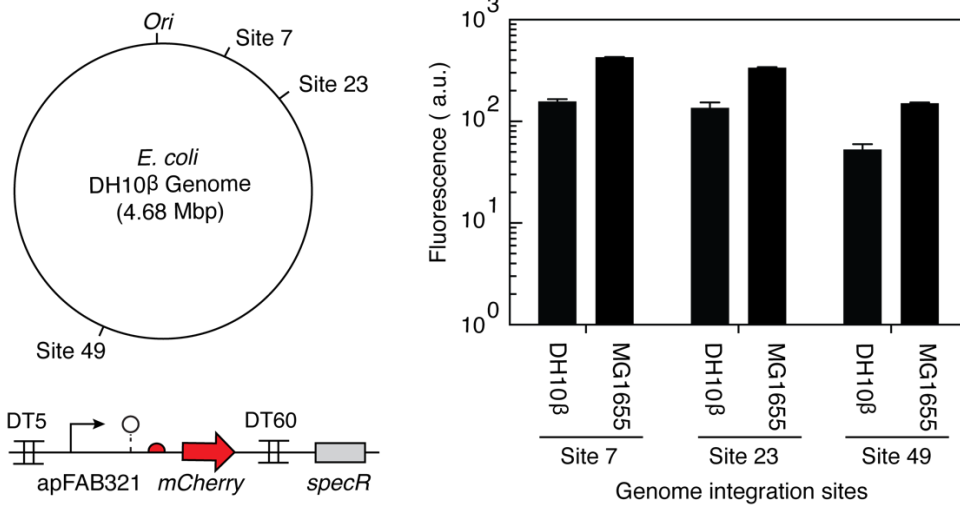

**Appendix Figure 2: Comparison of expression at different integration sites between *E. coli* strains.**

Three sites are shown, selected from the Tn5 library (Appendix Table 2) (corresponding to nt positions #4294255, #4614289, #1983293 in the genome sequence NCBI CP000948.1). The construct integrated at these sites is shown. The means of three experiments performed on different days are shown and the error bars are the standard deviations of these measurements.

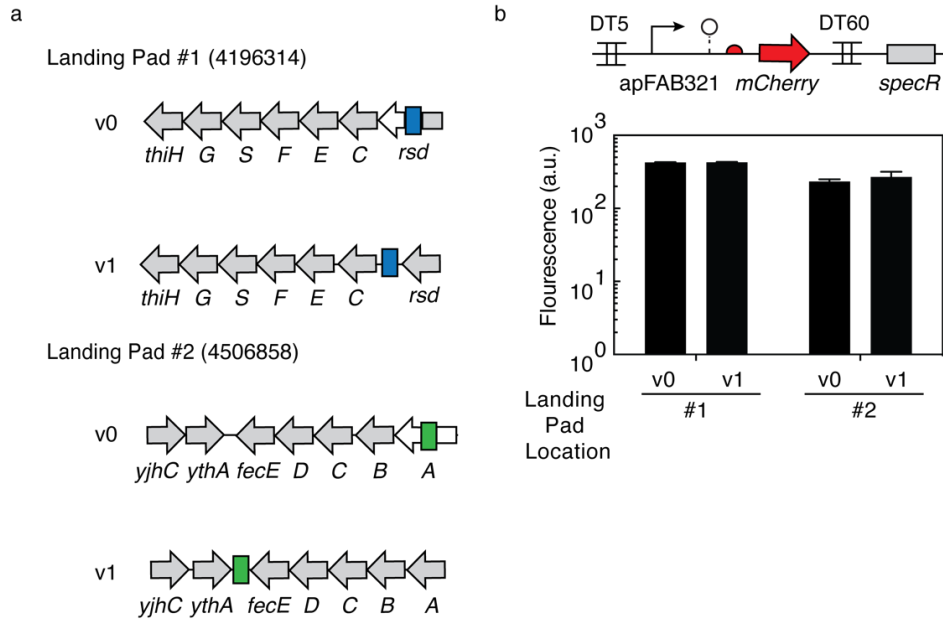

**Appendix Figure 3: Comparison of expression levels between landing pads. (a)** The locations of the landing pads in the genome are shown. **(b)** Experiments were performed where a constitutive expression cassette was evaluated at these positions (but not containing the context of the double terminators and integration sites) (Methods). The means are shown for three experiments performed on different days and the error bars are the standard deviations of these measurements.



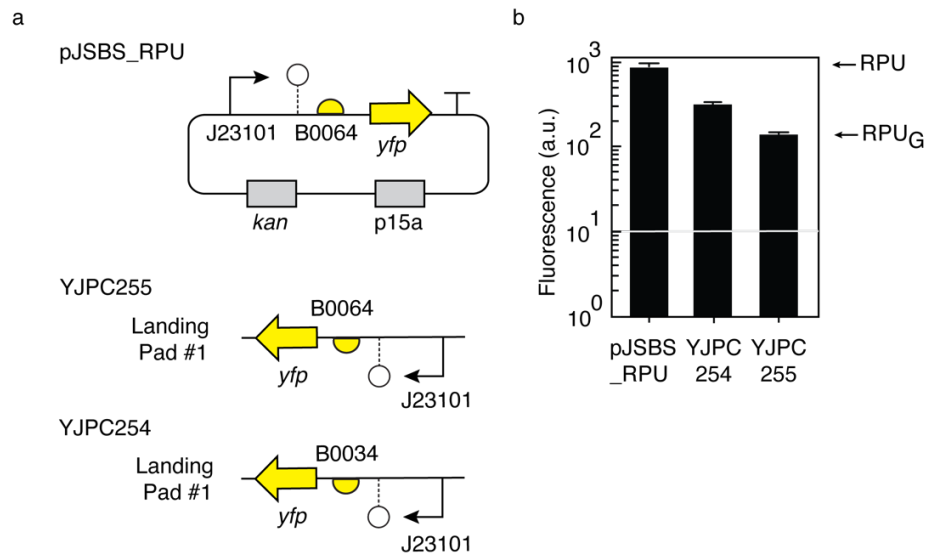

**Appendix Figure 4: Comparison between plasmid RPU and genome RPU<sub>G</sub> fluorescence levels. (a)**

The constructs used for evaluating the reference promoter are shown, with the plasmid names on the left<sup>1</sup>. **(b)** Fluorescence measurements of cells carrying the constructs are shown (Methods). The horizontal line shows the background fluorescence of cells. By comparing expression levels between the YJPC255 and pJSBS\_RPU plasmids, the conversion factor between RPU and RPU<sub>G</sub> was calculated (1 RPU = 6.3 RPU<sub>G</sub>). Part sequences are provided in Supplementary Table 5. The means are shown for three experiments performed on different days and the error bars are the standard deviations of these measurements.

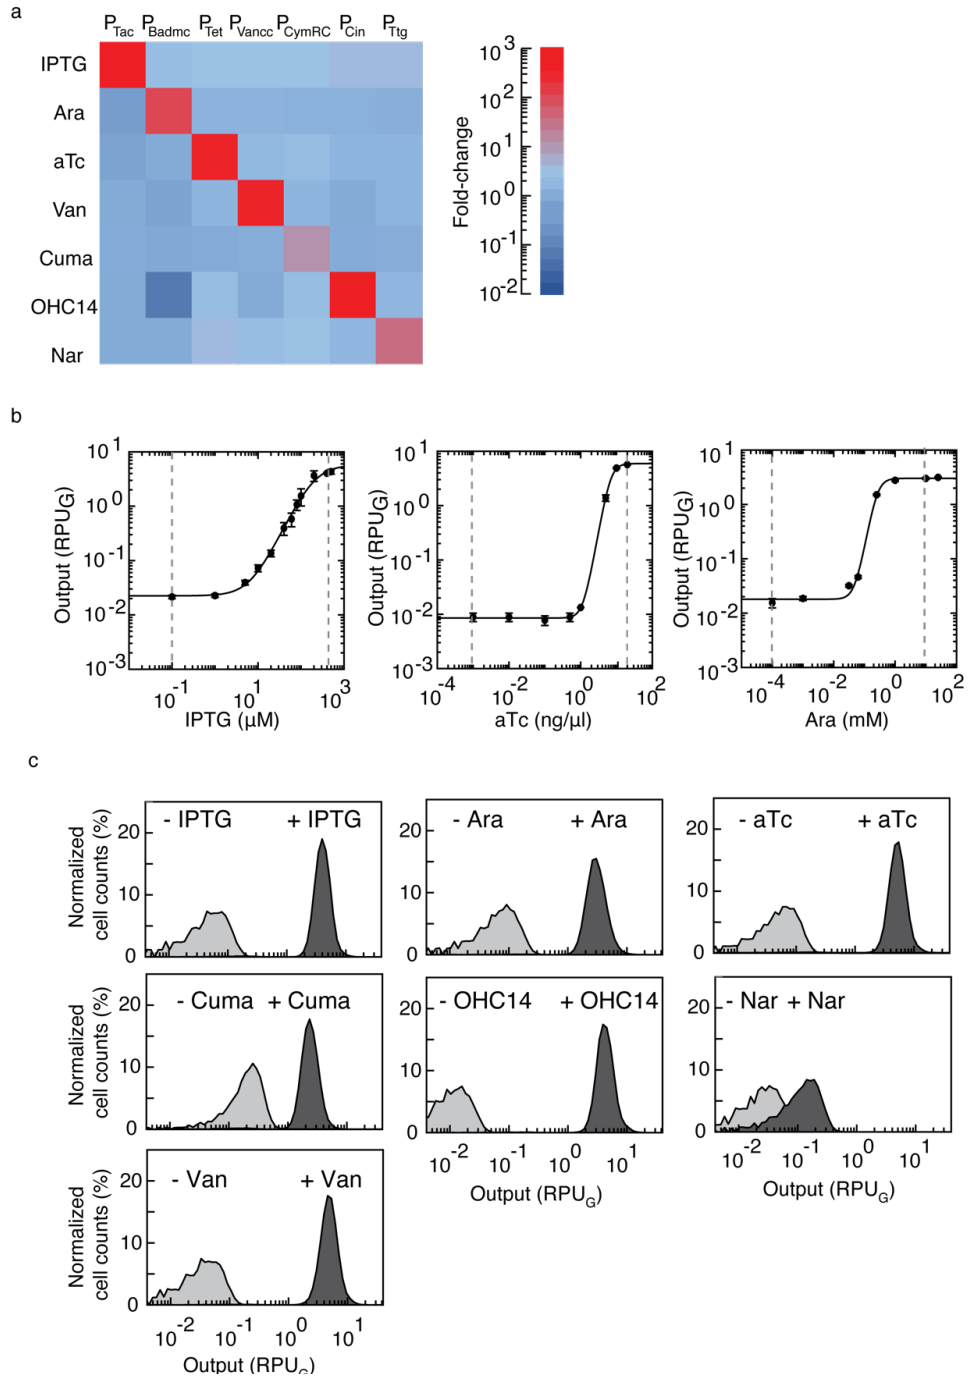

**Appendix Figure 5: Characterization of the sensor array at Landing Pad #1.** The genetic construct showing the sensors is shown in Figure 2c. **(a)** Sensor orthogonality. For these experiments, the output promoter of each sensor is transcriptionally fused to *yfp* and inserted into Landing pad #1 (Appendix Figure S18). The cross reactivity of the sensors is shown when the following inducer concentrations were used: 12.5 mM Ara, 1 mM IPTG, 20 ng/μl aTc, 500 μM Cuma, 200 μM Van, 10 μM OHC14, and 1 mM Nar.

The fold-change is calculated from the median fluorescence in the presence of inducer divided by that measured in its absence. Growth and measurement conditions are provided in the Methods. The data represents the mean from three replicates measured on different days. **(b)** Full response functions for the three sensors used in the circuit designs. The  $P_{Tac}$  response function shown was used to convert the x-axis of the NOT gate response functions from concentration to  $RPU_G$  (Appendix Figure S12). The means are shown for three experiments performed on different days and the error bars are the standard deviation of these measurements. Two gray dotted lines indicate inducer concentrations used for Cello prediction and circuit design. **(c)** The fluorescence distribution measured from flow cytometry and was converted into  $RPU_G$  (Methods). For each output promoter, both the OFF (without inducer, light gray) and ON (with inducer, darker gray) states are shown in the same plot. The experiments were repeated three times on different days with similar results. The mean of three replicates are shown in Figure 2C.

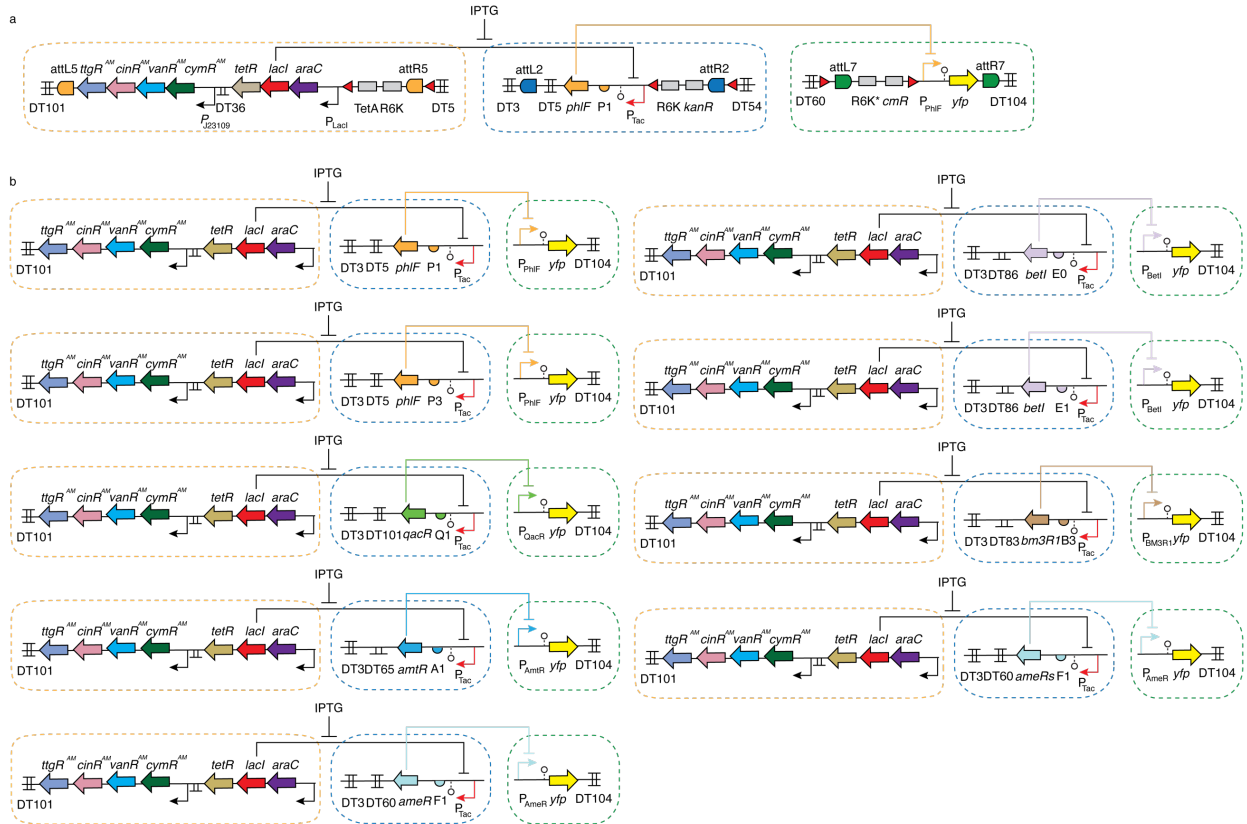

**Appendix Figure 6: Genetic schematics for the genome-encoded NOT gates. (a)** Schematic representation of the P1-PhIF-NOT gate on the genome. This construct is shown with the additional parts in the landing pad (e.g., antibiotic resistance genes). Genetic parts and the integration sequences are provided in Appendix Tables 4, 5 and 6. **(b)** Design of 9 NOT gates implemented on the genome (genomic parts not shown for clarity). The constructs inserted into each landing pad are: landing pad #1 (blue), landing pad #2 (green) and landing pad #3 (orange).

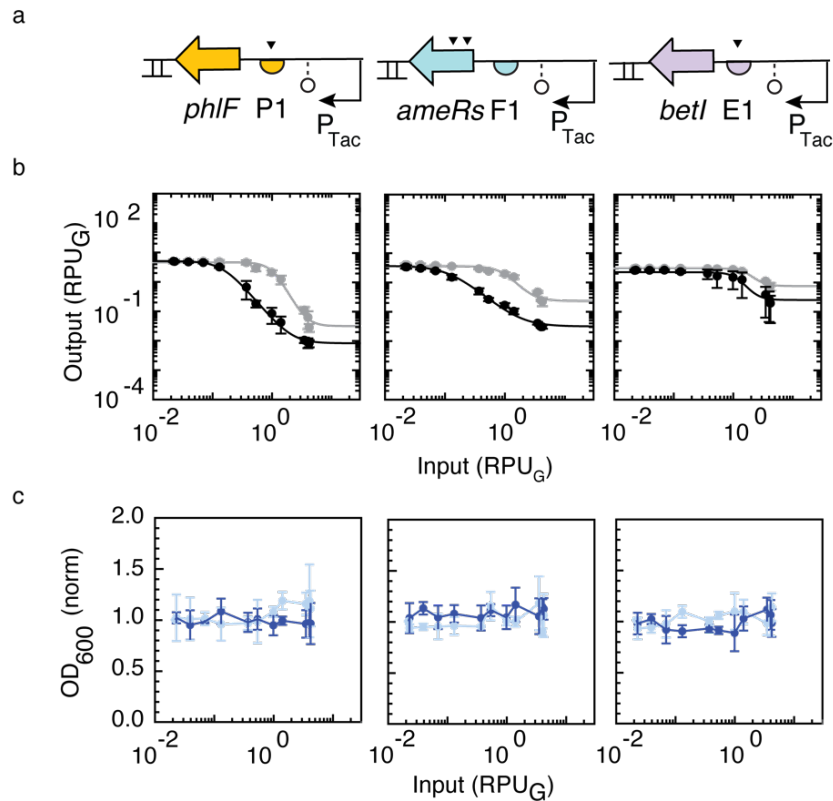

**Appendix Figure 7: Optimization of the NOT gates.** (a) Schematics of each gate; the changes made during optimization are indicated by the triangles. For the PhIF gate, the RBS was changed from P3 (CTTTACGAGGGCGATCCT) to P1 (CTATGGACTATGTTTGAAGGGAGAAATACTAG). Two mutations were made in *ameR* (R25H and R43S) to create *ameRs*. For the BetI gate, the RBS was changed from E0 (CCCCCGAGGAGTAGCAC) to E1 (CCTTCCGAGGAGGAGCACA). (b) The response functions before (gray) and after (black) optimization. (c) The impact on the growth of cells is shown before (light blue) and after (dark blue) optimization. The means are shown for three experiments performed on different days and the error bars are the standard deviations of these measurements.

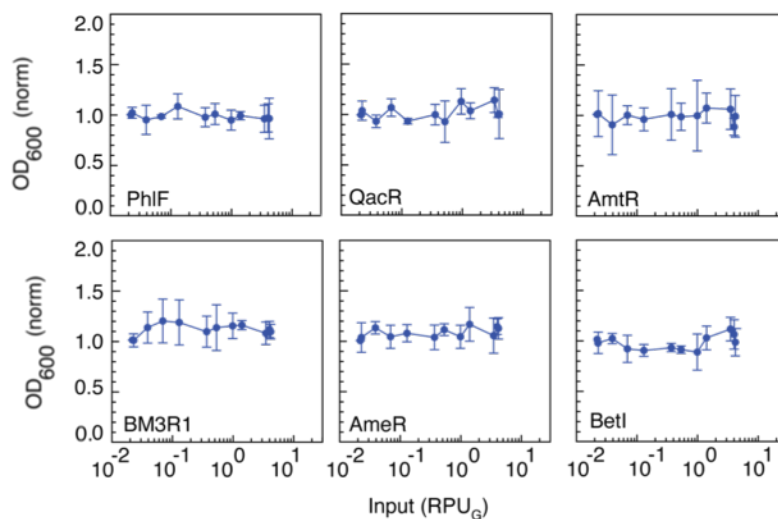

**Appendix Figure 8:** Growth impact of repressor expression from Landing Pad #1. Changes in OD<sub>600</sub> upon the expression of repressors are shown (Methods). These data were used to create the blue lines shown in Figure 2D. The means are shown for three experiments performed on different days and the error bars are the standard deviations of these measurements. Note that the data used to plot the growth impact of PhiF, BetI, AmeRs gates were also used in Appendix Figure S7.

0x08

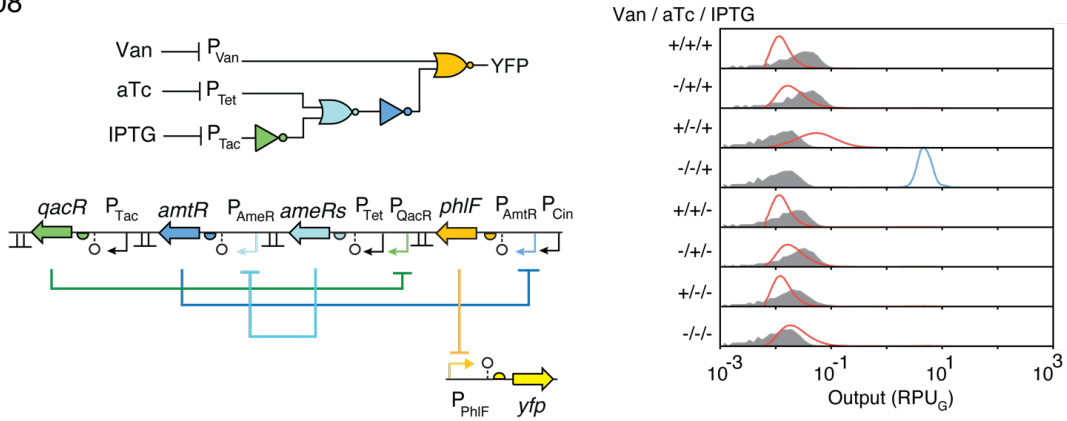

**Appendix Figure 9:** Example of a circuit designed using “tandem” NOR gates. The gates are based on two promoters in series driving the expression of the repressor (Figure 3F). The wiring diagram, repressor assignment, and genetic construct designed by Cello is shown. The predicted outputs are shown as blue (on) or red (off) distributions and the experimental data as gray distributions (Methods). The concentrations of inducers used are: 200 mM Van, 20 ng/μl aTc, and 1mM IPTG. The experiments were repeated three times on different days with similar results.

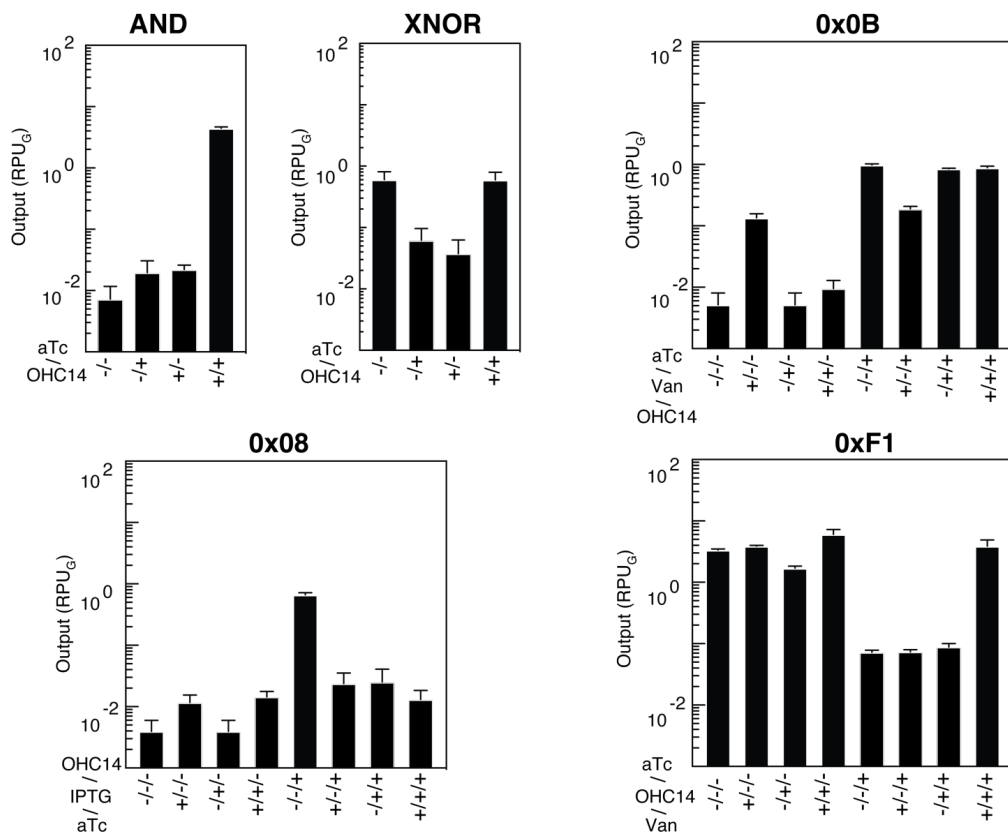

**Appendix Figure 10:** Replicate measurements are shown for the genetic circuits. This figure corresponds to the cytometry distributions in Figure 4. The concentrations of inducers used are: 1mM IPTG, 20 ng/μl aTc, 200 mM Van, and 10 μM of OHC14. These experiments were performed three times on different days and the means and standard deviations of the measurements are shown.



**0xF1- Plasmid Encoded**

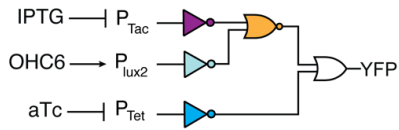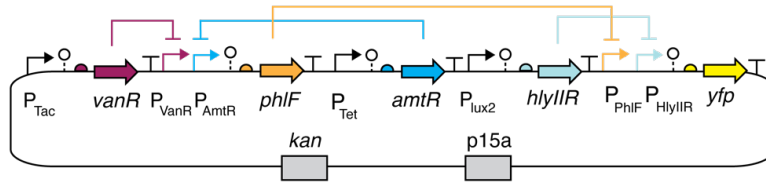

**aTc / IPTG / OHC6**

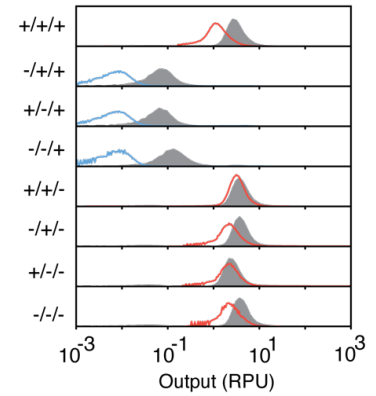

**Appendix Figure 11:** Cello-designed plasmid circuit for the 0xF1 logic operation. This logic operation corresponds to the genome-encoded circuit shown in Figure 4 and used for the evolutionary stability experiments in Figure 5. The following inducer concentrations are used: 2 ng/μl aTc, 0.2 mM IPTG and 10<sup>-4</sup> ng/μl OHC6. The distributions predicted by Cello are shown in blue (ON states) or red (OFF states) and the grey distributions are the experimental measurements. The experiments were repeated three times on different days with similar results.

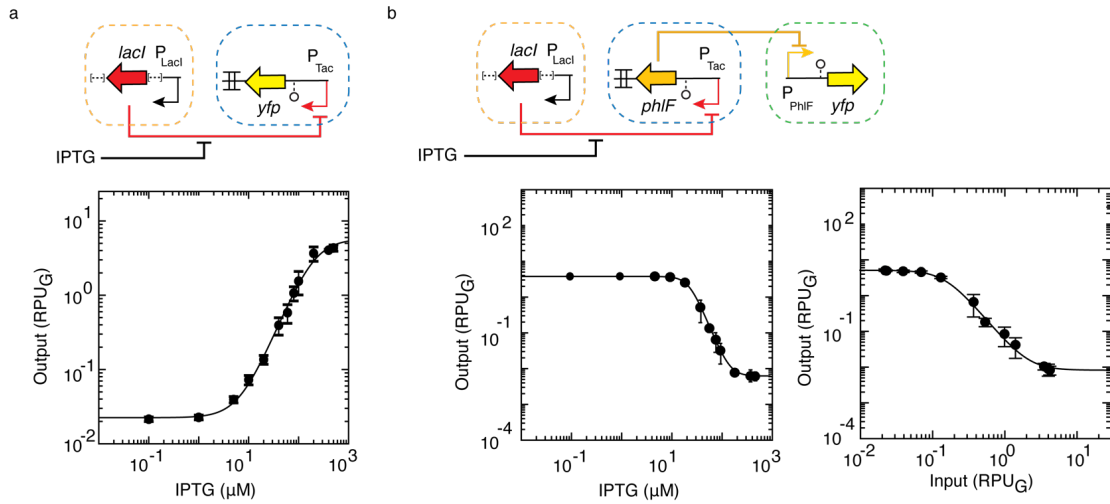

**Appendix Figure 12:** Conversion of x-axis of response functions from [IPTG] to RPU<sub>G</sub>. The constructs at each landing pad are shown: blue (LP #1), green (LP #2) and orange (LP #3). In all subfigures, the concentrations of IPTG used were 0.1, 1, 5, 10, 20, 40, 60, 80, 100, 200, 400, 500 μM. **(a)** The construct and response function from the IPTG sensor were first used to obtain the activity of  $P_{Tac}$ . (The [...] indicates the remainder of the sensor array, removed from the schematic for clarity). **(b)** The response function of the PhIF gate was first obtained as a function of IPTG (top). Then, the  $P_{Tac}$  activity at each IPTG concentration (part a) is used to convert the x-axis (bottom), which is used to fit to the response function to parameterize the gate. The data represent the means of three experiments performed on different days and the error bars are the standard deviations.

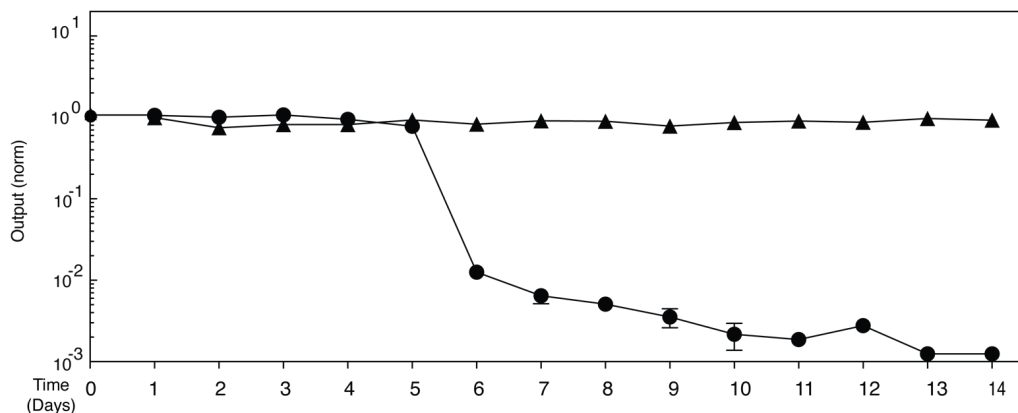

**Appendix Figure 13: Performance of genome- and plasmid- encoded circuits when passaged for two weeks.** The constructs tested are: plasmid (0xF1, YJP\_DHC54, circle) and genome (YJP\_MKC267, triangle). YJP\_MKC267 was streaked on LB agar (2%) plates with Kan (50  $\mu\text{g}/\text{ml}$ ) and Cm (35  $\mu\text{g}/\text{ml}$ ) antibiotics and grown overnight. YJP\_DHC54 was streaked on LB agar (2%) plates containing Kan (50  $\mu\text{g}/\text{ml}$ ) and grown overnight. Three individual colonies were inoculated in the M9 media without antibiotics. The circuits were tested under the presence of + 200  $\mu\text{M}$  vanillic acid (genome) or + 2  $\text{ng}/\mu\text{l}$  aTc (plasmid) (the other inducers are not present) in M9 media without antibiotics. Each day, cells were diluted 10,000-fold into 500  $\mu\text{l}$  of fresh M9 media containing the same inducer noted above and were grown for 8 hours at 37  $^{\circ}\text{C}$ . After the incubation at 37  $^{\circ}\text{C}$  and 900 rpm in a Multitron Pro incubator shaker (In Vitro Technologies, VIC, Australia), 30  $\mu\text{l}$  of cells were added to 200  $\mu\text{l}$  1x PBS with 2  $\text{mg}/\text{ml}$  Kan for flow cytometry analysis and 100  $\mu\text{l}$  of cells were mixed with 80% autoclaved glycerol (VWR chemical BDH1172-1LP) and stored at -80  $^{\circ}\text{C}$ . Another aliquot was diluted 100-fold into fresh media with the same inducer and incubated overnight. The cycle continued for 14 days by repeating this protocol. The means of three replicates are shown and the error bars are the standard deviations of these measurements. The error bars are often smaller than the data points. The output of the 0xF1 circuit was measured and normalized by the output at  $t = 0$  days. Wild type *E. coli* MG1655 autofluorescence was measured as the output value of 0.005 a.u. (dotted line).

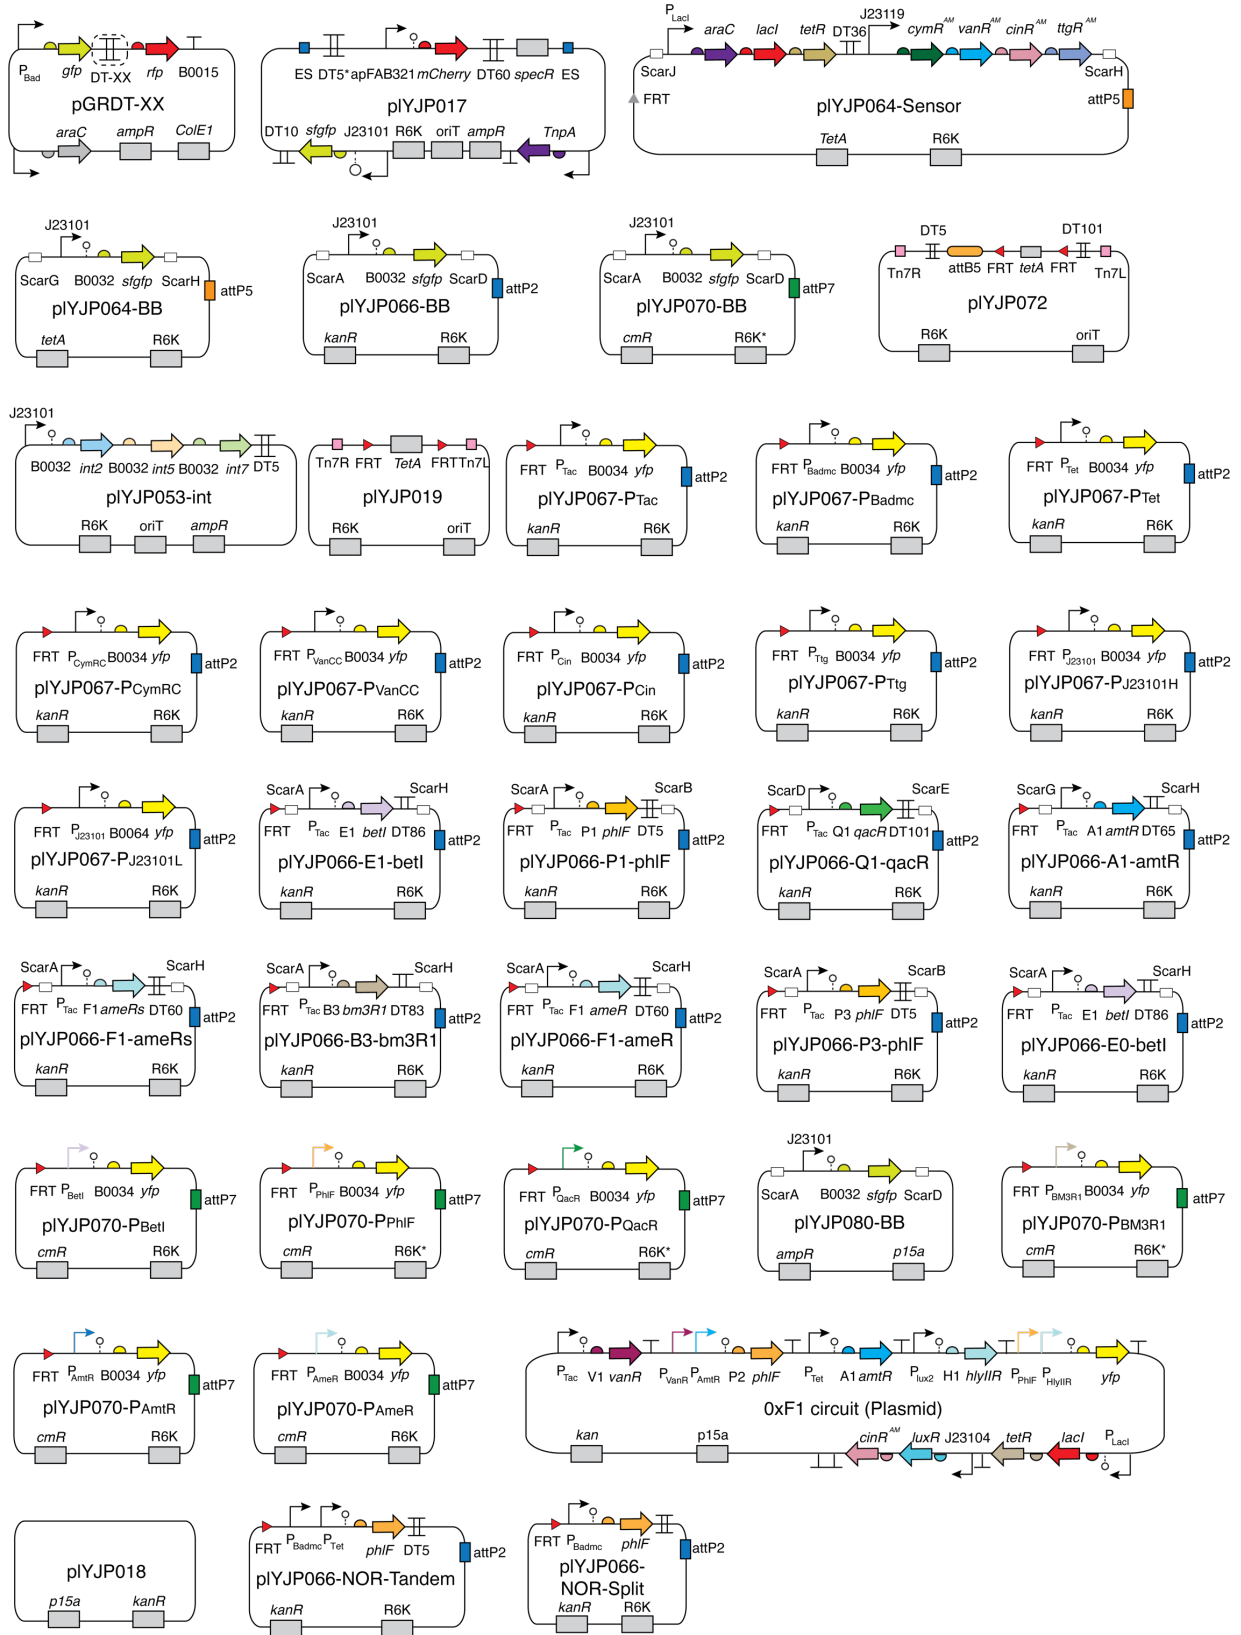

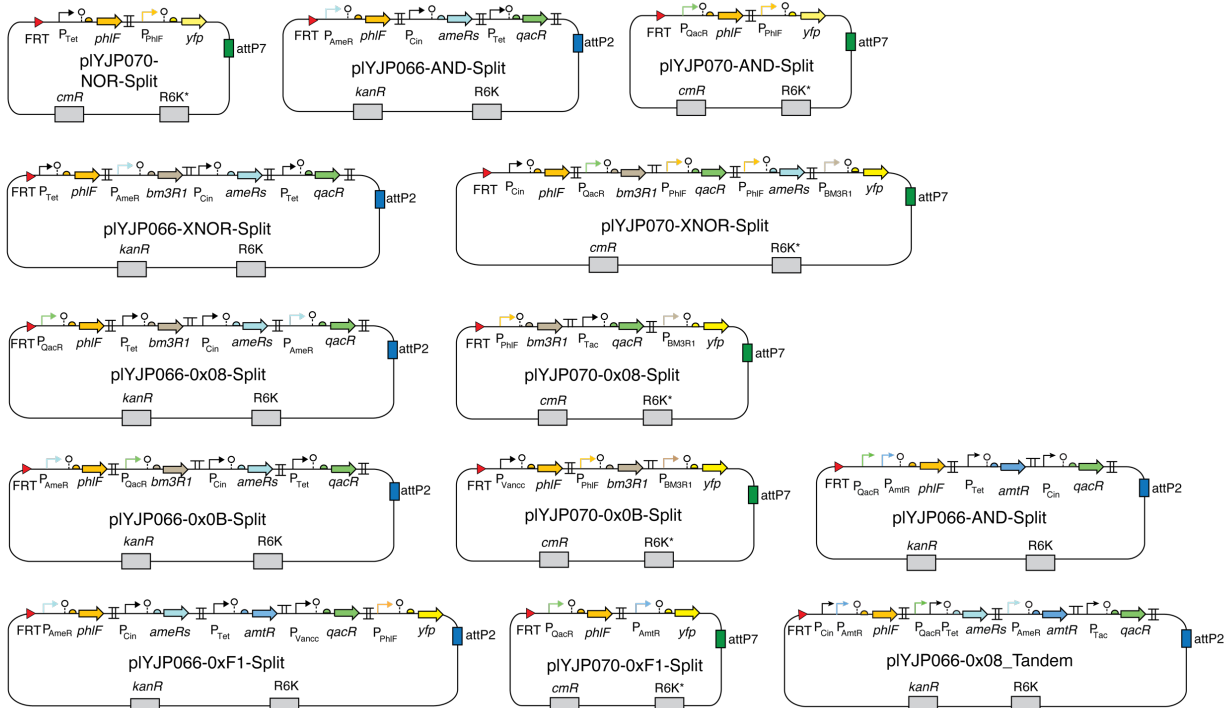

P<sub>J23101H</sub>-YFP reporter strain (YJP\_MKC254)

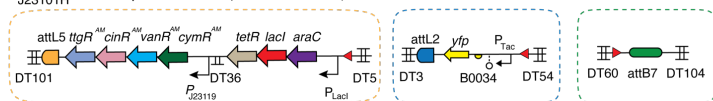

P<sub>J23101L</sub>-YFP reporter strain (YJP\_MKC255)

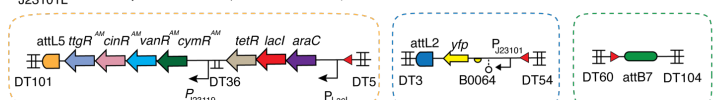

P<sub>Tac</sub>-YFP reporter strain (YJP\_MKC108)

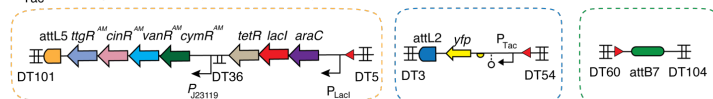

P<sub>Badmc</sub>-YFP reporter strain (YJP\_MKC110)

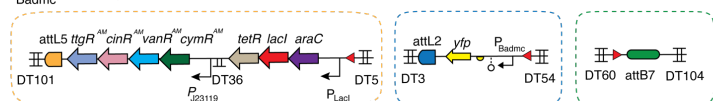

P<sub>Tet</sub>-YFP reporter strain (YJP\_MKC111)

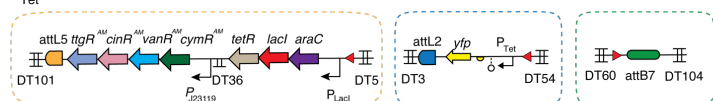

P<sub>CymRC</sub>-YFP reporter strain (YJP\_MKC112)

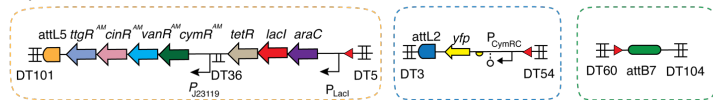

$P_{VanCC}$ -YFP reporter strain (YJP\_MKC113)

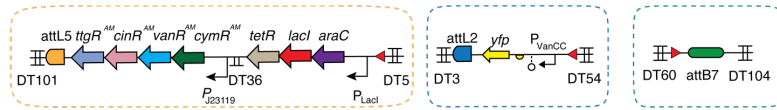

$P_{Cin}$ -YFP reporter strain (YJP\_MKC114)

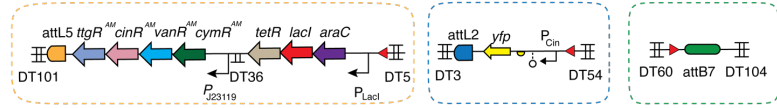

$P_{Tlg}$ -YFP reporter strain (YJP\_MKC115)

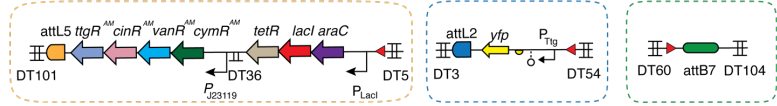

PhIF-NOR gate- Tandem design (YJP\_MKC258)

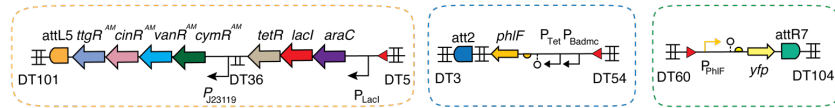

PhIF-NOR gate- Split design (YJP\_MKC259)

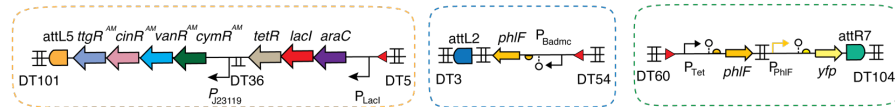

AND circuit- Split- (YJP\_MKC262)

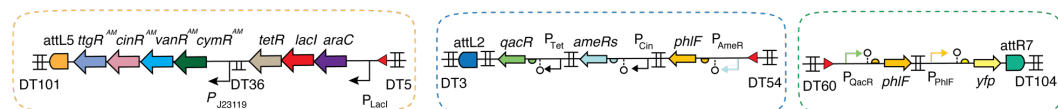

XNOR circuit (YJP\_MKC263)

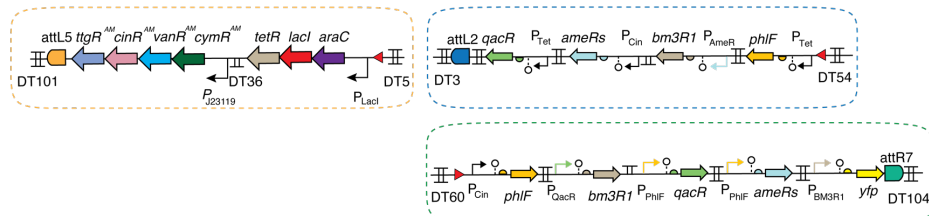

Ox08 circuit (YJP\_MKC264)

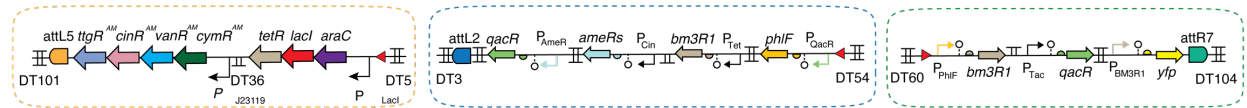

Ox0B circuit (YJP\_MKC265)

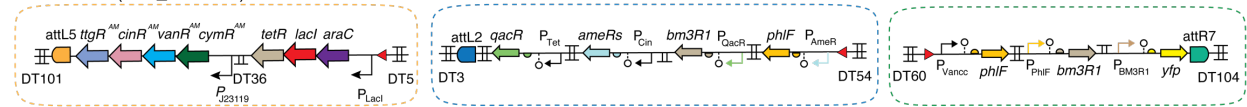

OxF1 circuit (YJP\_MKC266)

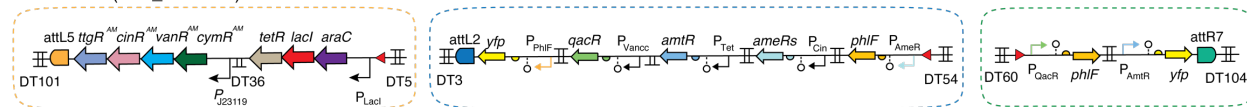

AND circuit (Tandem) (YJP\_MKC261)

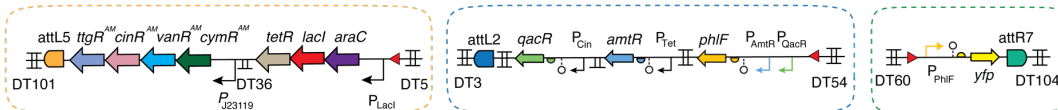

Ox08 circuit (Tandem) (YJP\_MKC262)

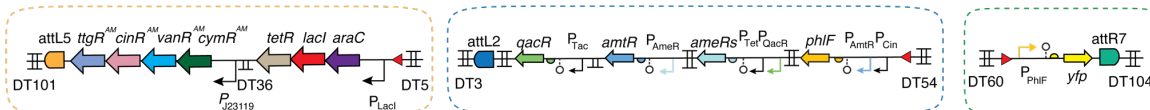

**Appendix Figure 14:** Plasmid and genome constructs used in this study. All genetic parts are provided in Appendix Table 5. Plasmid sequences are provided in Appendix Table 6.

## **Appendix Note 1: Detailed protocol for inserting payloads into genome landing pads**

### PREPARATION OF LANDING PAD CONSTRUCTS

Construct plasmids containing the payloads to be inserted in landing pads 1, 2, 3.

1. Clone payloads to one of pLYJP066-KanR, pLYJP070-CmR or pLYJP064-TetR plasmids to target landing pad 1,2, and 3, respectively.
2. Transform the cloned product into *E. coli* EC100D pir+ competent cells and sequence verify the construct
3. Miniprep plasmids (~250 ng/μl).

### PREPARATION OF ELECTROCOMPETANT CELLS CONTAINING LANDING PADS

1. Streak cells harboring empty landing pads (*E. coli* MG1655 YJPC173) on a 2% LB-agar plate without antibiotics and incubate overnight at 37 °C.
2. Pick a single colony and inoculate into 2 ml LB no salt media (water + 10 g/L tryptone + 5 g/L yeast extract, autoclaved) without antibiotics and incubate overnight at 37 °C, shaking at 250 rpm.
3. Dilute cells 50-fold 1 ml into 50 ml LB no salt medium in a 250-ml Erlenmeyer flask.
4. Grow 1-2 hours until reaching OD<sub>600</sub> = 0.55-0.65.
5. Pre-chill 50-ml Falcon tubes, electroporation cuvettes and 10% glycerol solution while cells are growing.
6. Transfer cells to pre-chilled 50-ml Falcon tubes.
7. Centrifuge cells at 4000g and 4°C for 10 minutes.
8. Remove the supernatant.
9. Resuspend cell pellet in 4 ml of ice-chilled 10% glycerol.
10. Centrifuge cells at 4000g and 4°C for 10 minutes.
11. Remove the supernatant.
12. Repeat Steps 9-11 twice more for a total of three glycerol washes.
13. Resuspend cell pellet in 175 μl of ice-chilled 10% glycerol, yielding electrocompetent cells.
14. If making frozen aliquots, which we have found decreases transformation efficiency, aliquot 100 μl cells into pre-chilled 200-μl PCR strip tubes. Each 100 μl aliquot will yield a single transformation.

### TRANSFORMATION WITH PAYLOAD DNA

15. Aliquot 100 μl cells into pre-chilled electroporation cuvettes.
16. Add 1500 ng of the integrase plasmid (pLYJP053) and 500-1000 ng of the DNA containing the plasmid with payload.
  1. In order to ensure that the electroporation does not arc, it is important to ensure minimal salts. Salts in prepped plasmids can be removed using plasmid dialysis
  2. For plasmid dialysis:
    - a. Fill appropriate number of wells in a 24-well plate with autoclaved Milli-Q purified water (one per transformation).
    - b. Place DNA dialysis disc (Millipore Sigma, USA, VSWP01300) floating on top of water.
    - c. Spot plasmids to be transformed on disc and leave for 30 minutes.
    - d. Carefully retrieve plasmids from discs using pipette without submerging disc.
  3. For higher throughput dialysis method, we have also used Pierce micro-dialysis plates (ThermoFisher Scientific, 88260).
17. Electroporate the mixture (Using the Eppendorf Electroporator 2510, we found that 2500 mA and a time constant after the transformation >4.0 worked best).
18. Immediately after electroporation, add 500 μl of SOC recovery media to the cells.



19. Incubate the cells at 30 °C for 1-2 hours and then spread on a 2% LB agar plate with appropriate antibiotic (Insertion in landing pad #1, #2 and #3 was selected with 50 µg/ml Kan, 35 µg/ml Cm or 5 ng/ml Tet, respectively).
20. Incubate overnight at 37 °C.
21. Pick colony and inoculate in 200 µl LB with appropriate antibiotic for 3 hours. Typically, we pick three colonies for a higher likelihood of identifying a successful integration.

#### PCR SCREENING FOR SUCCESSFUL INTEGRATION

22. Primers that can amplify the junction between integrated constructs and the adjacent genomic DNA were used to validate the integration of the payload. The following primers are used at concentrations of 10 µM.
  - a. LP #1: oYJP2164 (AATAAACAAATAGGCATGGTCTAAGAAACCATT)  
oYJP3436 (CCTGATCAGGTTCCGCGGATCCCGAATAAACGGTC)
  - b. LP #2: oYJP2164 (AATAAACAAATAGGCATGGTCTAAGAAACCATT)  
oYJP3526 (TGCCAAAGGCGATAGGTGAAATAATGTCGGCGACAGCGG)
  - c. LP #3: oYJP2166 (CACAAAACGGTTTACAAGCATAAAATCTCTG)  
oYJP2826(AGAGATGACAGAAAAATTTTCATTCTGTGACAGAGAAAAAGTAGCCGAAG  
ATG)
23. Prepare an aliquot of cells for the PCR reaction. Take 30 µl of the cultures from Step 21 and incubate them at 98 °C for 10 minutes.
24. Perform the PCR reaction. Our preference is NEB Hi-Fi Phusion Master Mix (NEB M0531) with the following volumes: 12.5 µl Phusion Master Mix 2X, 8.5 µl water, 1.25 µl, 1.25 µl Primer #1, 1.25 µl Primer #2, 1 µl template (the cell mixture from Step 23) and 0.5 µl DMSO. The thermocycler parameters are: 90s initial denaturation (98 °C), 20s denaturation (98 °C), 30 s anneal (60°C), 1 min/kb extension (72 °C), repeat denaturation/anneal/extension steps 29 times, 1 kb/min final extension (72 °C).
25. Confirm the amplicon size using gel electrophoresis by adding 5 µl of PCR product into 1% agarose gel. NEB 1kb ladder was run together to confirm the size.

#### REMOVAL OF ANTIBIOTIC RESISTANCE MARKERS

26. Inoculate the 170 µl culture from Step 21 to 4 ml SOB without antibiotics for 3 hours at 37 °C.
27. Once cells reach OD<sub>600</sub>=0.4, Centrifuge cells at 4700g and 4 °C for 10 minutes.
28. Remove the supernatant.
29. Add 1 ml of ice-chilled 10% glycerol to the cell pellet.
30. Transfer the resuspended cells into a 1.5 ml Eppendorf tube and centrifuge at 21000g and 4 °C for 30 seconds.
31. Remove the supernatant.
32. Repeat steps 30 to 31.
33. Add 20 ng of the FLP encoding plasmid (pE-FLP)
34. Electroporate the mixture using the Eppendorf Electroporator 2510 at 2500 mA with time constant after the transformation >4.0.
35. Immediately after electroporation, add 1 ml of SOC recovery media to the cells.
36. Incubate the cells at 30 °C for 1 hour and then spread on a 2% LB agar plate with 100 µg/ml.
37. Incubate the cells overnight at 30 °C
38. Pick colony and streak the colony on 2% LB agar plate with no antibiotics.
39. Pick 5-6 colonies from the streak after 14 hours of incubation and resuspend each to 30 µl LB without antibiotics.

40. Inoculate the resuspended cells into 5 different media by adding 5  $\mu$ l of resuspended cells. The five media compositions are: LB without antibiotics, with Amp 100  $\mu$ g/ml, Kan 50  $\mu$ g/ml, Cm 35  $\mu$ g/ml, Tet 5 ng/ml. Incubate at 37  $^{\circ}$ C overnight.
41. Find colonies that only grew on LB without antibiotics.
42. Take 30  $\mu$ l of the cultures from Step 41 and incubate them at 98  $^{\circ}$ C for 10 minutes.
43. PCR amplify using following oligos to confirm the removal of antibiotic markers from landing pads.
44. Primers that can amplify the junction between integrated constructs and the adjacent genomic DNA were used to validate the integration of the payload. The following primers are used at concentrations of 10  $\mu$ M.
  - a. LP #1:  $\phi$ YJP3436 (CCTGATCAGGTTCCGCGGATCCCGAATAAACGGTC)  
 $\phi$ YJP3437 (AGGCGCTGGAAGCGCGCTTTGTGCTGGAAGATAAG)
  - b. LP #2:  $\phi$ YJP3525 (ACCAATTGGCGCGCTTCGCAATAAAATCTCCCTTCG)  
 $\phi$ YJP3526 (TGCCAAAGGCGATAGGTGAAATAATGTCGGCGACAGCGG)
  - c. LP #3:  $\phi$ YJP2826  
 (AGAGATGACAGAAAAATTTTCATTCTGTGACAGAGAAAAAGTAGCCGAAGATG)  
 $\phi$ YJP2827 (CCGCGTAACCTGGCAAAATCGGTTACGGTTGAGTAA)
45. Perform the PCR reaction. Our preference is NEB Hi-Fi Phusion Master Mix (NEB M0531) with the following volumes: 12.5  $\mu$ l Phusion Master Mix 2X, 8.5  $\mu$ l water, 1.25  $\mu$ l, 1.25  $\mu$ l Primer #1, 1.25  $\mu$ l Primer #2, 1  $\mu$ l template (the cell mixture from Step 42) and 0.5  $\mu$ l DMSO. The thermocycler parameters are: 90s initial denaturation (98  $^{\circ}$ C), 20s denaturation (98  $^{\circ}$ C), 30 s anneal (66 $^{\circ}$ C), 1 min/kb extension (72  $^{\circ}$ C), repeat denaturation/anneal/extension steps 29 times, 1 kb/min final extension (72  $^{\circ}$ C).
46. Confirm the amplicon size using gel electrophoresis by adding 5  $\mu$ l of PCR product into 1% agarose gel. NEB 1kb ladder was run together to confirm the size.
47. Once the size is confirmed, add 25% autoclaved glycerol (v/v) to create glycerol stock.
48. Store glycerol stock at -80  $^{\circ}$ C.

**Appendix Table 1: Double terminator sequences and strengths**

| Name  | Sequence                                                                                                                                                           | T <sub>s</sub> (forward) <sup>a</sup> | T <sub>s</sub> (reverse) <sup>a</sup> |
|-------|--------------------------------------------------------------------------------------------------------------------------------------------------------------------|---------------------------------------|---------------------------------------|
| DT3   | CCGGCTTACGGTCAGTTTCACCTGATTTACGTAAAAACCCGCTTCGGCGGGTTTTTGCTTTGGAGGGGCAGAAAGATGAATGACTGTCCACGACGCTATACCAAAGAAAAAACCCTCCCTGACAGGGCGGGTTTTTTTT                        | 3000                                  | 120                                   |
| DT5   | TCCGGCAATTAATAAAGCGGCTAACCCAGCGCTTTTTACGTCTGCACTCGGTACCAATTCAGAAAAAGGGCTCCCGAAAGGGGGCTTTTTTCGTTTTGGTCC                                                             | 4700                                  | 50                                    |
| DT19  | TTCAGCCAAAACTAAGACCGCGGTCTGTCCACTACCTTGCAAGTAATGCGGTGGACAGGATCGGCGGTTTTCTTTCTCTCTCAACTCGGTACCAAGACGAAACAATAAGACGCTGAAAAAGCGCTTTTTTCGTTTTGGTCC                      | 770                                   | 1.2                                   |
| DT34  | GCTGATGCCAGAAAGGTCCTGAATTTCAAGGCCCTTTTTTACATGGATTGCTCGGTACCAATTCAGAAAAAGAGACGCTTTCGACGCTTTTTTCGTTTTGGTCC                                                           | 570                                   | 1.4                                   |
| DT36  | GATCTAACAAAAAGGCGCTCTGCGGCCTTTTCTTTCACTGTAACAACGGAAACCGCCATTGCGCGGTTTTTTTTGGCCT                                                                                    | 680                                   | 3.2                                   |
| DT42  | AGTTAACCAAAAAAGGGGGATTTTATCTCCCTTTAATTTTTCTCTCGCAGATAGCAAAAAAGCGCTTAGGGCGCTTTTTTACATTGGTG                                                                          | 2500                                  | 2.2                                   |
| DT54  | GGAAACACAGAAAAAGCCGCACTGACAGTGCAGGCTTTTTTTTCGACCAAGGCTCGGTACCAATTCAGAAAAAGACACCCGAAAGGGTGTTTTTTCGTTTTGGTCC                                                         | 1800                                  | 30                                    |
| DT56  | TACCACCGTCAAAAAACGGCGCTTTTAGCGCCGTTTTATTTTTCAACCTTCCAGGCATCAATAAACAAGGCTCAGTCGAAGACTGGGCTTTCGTTTTATCTGTGTTGTGCGGTGAACGCTCTC                                        | 240                                   | 11                                    |
| DT60  | ACATTTAATAAAAAAGGGCGGTGCAAGATCGCCCTTTTTTACGTATGACACAGTGAAAAATGGCGCCATCGGGCCATTTTTTTATG                                                                             | 110                                   | 29                                    |
| DT65  | TGCTCGTACCAGGCCCTGCAATTTCAACAGGGCGCTTTTTTATCCAATTCATCGGGTCCGAATTTTCGGACCTTTCTCCGC                                                                                  | 400                                   | 1.0                                   |
| DT82  | CTTATTCCATAACAAAGCCGGGTAATCCCGCTTTGTTGTATCTGAACAATAAATGGATGCCCTGCGTAAGCGGGCATTTTTCTCTCT                                                                            | 170                                   | 2.8                                   |
| DT83  | AGCGTCAAAAGCCGGATTTTCGGCCTTTTTTATTAGGCAGCATGCTGCCAGGTGATCCCTGGCCACCTCTTTT                                                                                          | 600                                   | 4.4                                   |
| DT86  | TAATCATTCTTAGCGTGACCGGGAAGTGGTACGCTACCTCTTGAAGAAACAGCAACAATCCAAAACGCCGTTACGCGCGCTTTTTCTGCTTTCT                                                                     | 210                                   | 0.4                                   |
| DT100 | GTGAAGTGAATAATGGCGCACATTGTGCGCAATTTTTTTGTCTGCCGTTTACCGCTTCTCTGAAAATCAACGGGCAGGTCACTGACTTGCCCGTTTTTTTATCCCTTCCACACCG                                                | 4700                                  | 12                                    |
| DT101 | TCTTTAAAAAGAACTCCGCAATGCGGAGGTTTCGCCTTTTGATACTGTCTGAAGTAATCTGCGCAGTGAATAATGGCGCCCATCGGCGCCATTTTTTATGCTTCCATTAGAAAGCAAAAGCCTGCTAGAAAGCAGGCTTTTTTGAAATTTGGCTCCTCTGAC | 2800                                  | 160                                   |
| DT103 | AAAGTTCTGAAAAAGGGTCACTTCGGTGGCCCTTTTTATCGCCACGTTTGAGCAGTGCACCTGCTTAAATCCCGCCAGCGGGGATTTTTTTATTGTCCGGTTTAAGACA                                                      | 790                                   | 4.0                                   |
| DT104 | GCAGACAAAAAATGGCGCACATGTGCGCCATTTTCACTCACAGTACTATTGTTTTGAAATGAAAAGGGCGCTTCGGCGCCCTTTTTGCATTTGTGACGGCATATATTGTATATCGAAGCCCTGATGGGCGCTTTTTTATTAAATCGATAACCAGA        | 580                                   | 101                                   |

*a. The means of three replicates performed on different days are shown. The conditions and calculation of T<sub>s</sub> are provided in the Methods and Appendix Figure 1.*

**Appendix Table 2: Transposon library results for *E. coli* DH10 $\beta$**

| Number    | Position <sup>a</sup> | Strand | Expression <sup>b,c</sup> | Relative OD <sub>600</sub> <sup>b,d</sup> |
|-----------|-----------------------|--------|---------------------------|-------------------------------------------|
| 1         | 3986119               | -      | 160                       | 1.5                                       |
| 2         | 239205                | +      | 140                       | 1.3                                       |
| 3         | 1703536               | +      | 50                        | 1.1                                       |
| 4         | 4403940               | -      | 110                       | 0.9                                       |
| 5         | 2354832               | -      | 90                        | 1.1                                       |
| 6         | 3821587               | +      | 120                       | 1.3                                       |
| 7 (LP#1)  | 4294255               | -      | 160                       | 1.1                                       |
| 8         | 3636005               | -      | 130                       | 1.1                                       |
| 9         | 216090                | +      | 110                       | 1.2                                       |
| 10        | 130791                | +      | 80                        | 1.0                                       |
| 11        | 1974358               | -      | 60                        | 1.2                                       |
| 12        | 953620                | +      | 80                        | 1.4                                       |
| 13        | 3942414               | +      | 180                       | 1.1                                       |
| 14        | 4577260               | +      | 110                       | 1.0                                       |
| 15        | 4185554               | -      | 130                       | 1.2                                       |
| 16        | 3635939               | +      | 160                       | 1.0                                       |
| 17        | 3293003               | -      | 130                       | 1.2                                       |
| 18        | 970929                | -      | 80                        | 1.2                                       |
| 19        | 2968336               | -      | 110                       | 1.0                                       |
| 20        | 3280886               | -      | 60                        | 1.2                                       |
| 21        | 3839522               | -      | 120                       | 1.1                                       |
| 22        | 3007855               | +      | 90                        | 1.4                                       |
| 23 (LP#3) | 4000978               | -      | 150                       | 1.2                                       |
| 24        | 4160155               | +      | 140                       | 1.0                                       |
| 25        | 311535                | +      | 80                        | 1.3                                       |
| 26        | 4158775               | +      | 130                       | 1.1                                       |
| 27        | 2612824               | -      | 80                        | 1.1                                       |
| 28        | 3119521               | -      | 110                       | 1.2                                       |
| 29        | 268509                | +      | 90                        | 0.9                                       |
| 30        | 3286750               | +      | 100                       | 1.0                                       |
| 31        | 4575120               | -      | 110                       | 0.9                                       |
| 32        | 4648089               | +      | 90                        | 1.4                                       |
| 33        | 4525992               | +      | 60                        | 1.1                                       |
| 34        | 3149195               | -      | 70                        | 0.8                                       |
| 35        | 3851188               | -      | 140                       | 1.1                                       |
| 36        | 3792231               | +      | 150                       | 1.0                                       |
| 37        | 2691678               | -      | 100                       | 1.2                                       |
| 38        | 4078450               | -      | 190                       | 1.0                                       |
| 39        | 3008076               | -      | 90                        | 0.9                                       |
| 40        | 3357859               | -      | 90                        | 1.3                                       |
| 41        | 124347                | -      | 90                        | 0.8                                       |
| 42        | 4161116               | +      | 100                       | 0.9                                       |
| 43        | 6673                  | -      | 140                       | 0.8                                       |
| 44        | 1434023               | -      | 60                        | 1.0                                       |
| 45        | 3268733               | +      | 110                       | 0.9                                       |
| 46        | 2763676               | -      | 100                       | 1.0                                       |
| 47        | 391229                | +      | 120                       | 1.5                                       |
| 48 (LP#2) | 4614289               | +      | 140                       | 1.3                                       |
| 49        | 1983293               | +      | 50                        | 0.7                                       |
| 50        | 4519171               | -      | 80                        | 1.0                                       |

a. The number is based on the nucleotide numbering of the *E. coli* DH10 $\beta$  genome (NCBI CP000948.1)

b. The means of three experiments performed on different days are shown.

c. The expression is measured as mCherry fluorescence (Methods). The construct is shown in Figure 1b

d. The relative OD<sub>600</sub> is calculated by dividing the OD<sub>600</sub> by that of wild-type *E. coli* DH10 $\beta$  (Methods)

**Appendix Table 3: ON/OFF levels for genome-encoded sensors**

| <b>Inducer</b> | <b>Output Promoter</b> | <b>Strain</b> | <b><math>Y_{\min}</math><br/>(<math>RPU_G</math>)</b> | <b><math>Y_{\max}</math><br/>(<math>RPU_G</math>)</b> |
|----------------|------------------------|---------------|-------------------------------------------------------|-------------------------------------------------------|
| Ara            | $P_{Badmc}$            | YJP_MKC110    | 0.04                                                  | 3.33                                                  |
| IPTG           | $P_{Tac}$              | YJP_MKC108    | 0.02                                                  | 4.20                                                  |
| aTc            | $P_{Tet}$              | YJP_MKC111    | 0.02                                                  | 5.41                                                  |
| Cuma           | $P_{CymRC}$            | YJP_MKC112    | 0.19                                                  | 2.39                                                  |
| Van            | $P_{VanCC}$            | YJP_MKC113    | 0.02                                                  | 3.79                                                  |
| OHC14          | $P_{Cin}$              | YJP_MKC114    | 0.01                                                  | 4.38                                                  |
| Nar            | $P_{Ttg}$              | YJP_MKC115    | 0.01                                                  | 0.22                                                  |

**Appendix Table 4: Sequence of landing pads used in this study**

| Landing Pad <sup>a</sup> | Position | DNA Sequence <sup>c</sup>                                                                                                                                                                                                                                                                                                                                                                                                                                                                                                                                                                                                                                                                                                                                                                                                                                                                                                                                                                                                                                                                                                                                                                                                                                                                                                                                                                                                                                                                                                                                                                                                                                                                                                                                                                                                                                                                                                                                          |
|--------------------------|----------|--------------------------------------------------------------------------------------------------------------------------------------------------------------------------------------------------------------------------------------------------------------------------------------------------------------------------------------------------------------------------------------------------------------------------------------------------------------------------------------------------------------------------------------------------------------------------------------------------------------------------------------------------------------------------------------------------------------------------------------------------------------------------------------------------------------------------------------------------------------------------------------------------------------------------------------------------------------------------------------------------------------------------------------------------------------------------------------------------------------------------------------------------------------------------------------------------------------------------------------------------------------------------------------------------------------------------------------------------------------------------------------------------------------------------------------------------------------------------------------------------------------------------------------------------------------------------------------------------------------------------------------------------------------------------------------------------------------------------------------------------------------------------------------------------------------------------------------------------------------------------------------------------------------------------------------------------------------------|
| #1                       | 4196314  | <p>GGAAACACGAAAAAGCCCGCACCTGACAGTGGCGGCTTTTTTTTCGACCAAGGCTCGGTACCAATTCAGAAAAAGACCCCGAAAGGGTGTTTTT<br/> CGTTTTGGTCCGAAGTTCCTATTCTCTAGAAAAGTATAGGAAGTTCGGTCCCAATAATACGATTTAAATTTGGCGAAAATGAGACGTGATCGGCACGTA<br/> AGAGGTTCCAACCTTTCACCATAATGAAATAAGATCACTACCGGGCGTATTTTTTGAGTTATCGAGATTTTCAGGAGCTAAGGAAGCTAAAAATGGAGAAAA<br/> AATCACTGGATATACCACCGTTGATATATCCCAATGGCATCGTAAAGAACATTTTGGAGCAATTCAGTCAGTTGCTCAATGTACCTATACCCAGACCGTTT<br/> AGCTGGATATACCGCCTTTTTAAAGACCGTAAAGAAAAATAAGCAAGTTTATCCGGCCTTATTCACATCTTCCCGCCTGATGAATGCTCATCCG<br/> GAATTCGTATGGCAATGAAAGACGGTGGTGTATGGGATAGTGTTCACCCCTGTACACCGTTTCCATGAGCAAACTGAAACGTTTTCATCGCT<br/> CTGGAGTGAATACACGACGATTTCCGGCAGTTTCTACACATATATTCGAAGATGTGGCGTTCAGGTGAAACCTGGCCTATTTCCCTAAAGGGTTTA<br/> TTGAGAATATGTTTTTCGCTCAGCACAATCCCTGGGTGAGTTTCCACAGTTTGTATTTAAACGTGGCCAAATGGAACAATCTTCCGCCCGCTTTTCACC<br/> ATGGGCAAAATATATACGCAAGGCGCAAGGTGCTGATGCCCTGGCGATTCCAGTTTCATCATGCCGTTTGTGATGGCTTCCATGTCGGCAGAAATGCTTAA<br/> TGAATTTACAACAGTACTCGCATGAGTGGCAGGGCGGGCGTAAAGAGTTCCTATTCTCTAGAAAAGTATAGGAAGTTCGGACGGCGCAGAAAGGGAGTAGCT<br/> CTTCCGCCGACCGTCGACATCTGCTCAGCTCGTCCCGGCTTTCGGTTCAGTTTACCTGATTTACGTAACCAACCCGCTTCCGGCGGTTTTTGGCTTTTGGTA<br/> GGGGCAGAAAGATGATGACTGTCCACGACGCTATCCCAAAAAGAAAAAAAACCCCGCCCTGACAGGGGGGGTTTTTTTTGCTTCAATAGCCGAT<br/> TTGACAGCTAGCTCAGTCTAGGTATTGGCTAGC</p>                                                                                                                                                                                                                                                                                                                                                                                                                                                                                                                                                                                                                           |
| #2                       | 4506858  | <p>ACATTTAATAAAAAAGGGCGGTGCAAGATCGCCCTTTTTACGATGACACAGTGAATAATGGGCCCCATCGGCCCCATTTTTTATGGAAGTTCCTAT<br/> TCTCTGAAAAGTATAGGAAGTTCACCGCTCACCAGCTCCAGATTTATCAGCAATAAACAGCCAGCCGGAAGCTCGATCCCGTCAAGTCAGCTTAATGCT<br/> CTGCCAGTGTACAACCAATTAACAATTCGTATGAGAAAACTCATCGAGCATCAAAATGAACTGCAATTTATTCATATCAGGATATCAATACCATATT<br/> TTTGA AAAAGCCGTTTCTGTAATGAAGGAGAAAACTCACCAGGCAAGTTCATAGGATGGCAAGATCCTGGTATCGGTCTGGGATTCGGACTCGTCCAAACA<br/> TCAATACAACCTATTAATTTCCCTCGTCAAAAATAAGGTATCAAGTGAGAAATCACCATGAGTGACCACTGAATCCGGTGAAGATGCAAAAAGCTTATG<br/> CATTTCTTCCAGACTGTTCACAGCCAGCCATACGCTCGTCATCAAAATCACTCCGATCAACCAACCCGTTATTCATTCGTGATGGCCCTGAGCGA<br/> GACGAAATACCGCATCGCTGTAAAAGGCAATACAAACAGGAATCGAATCAACCCGCGCAGGAACACTGCCAGCCATCAACAATATTTACCTCAA<br/> TCAGGATATTTCTAATACCTGGAATGCTGTTTTCCCGGGATCGCAGTGGTGAATACCATGCATCATCAGGATGAGGATAAAATGCTTGTGTTGCTG<br/> AAGAGGCATAAATTCCTGACGACGTTAGTCTGACCATCTCATCTGTAACATCATTTGCCAACGCTACCTTTGCCATGTTTCAGAAACAACTTCGGCCAT<br/> CGGGCTCCCATACAATCGATAGATTGTCGACCTGATGGCCGACATATCGCGAGCCATTTATACCCATATAAATCAGCATCCATGTTGAAATTTAAT<br/> CGCGCCCTCGAGCAAGACGTTTCCCGTTGAATATGGCTCATAAACACCCCTTGTATTACTGTTTATGTAAGCAGACAGTTTTATTGTTTCATGATGATATATT<br/> TTTTATCTGTGCAATTAACATCAGAGATTTTGAAGACAACTGTGGCTTTTGTGAAAGTTCCTATTCTCTAGAAAAGTATAGGAAGTTCAGACGAGAAACG<br/> TTCGGTCCCTCTGGGTCACTTGGGCAAGTTGATGACCGGGTCTCGGTTGCAGACAAAAAATGGCCGCAATGTGGCCACTTTTCACTTCACAGGTA<br/> CTATTGTTTTGAATGAAAAGGGCGCTTCGGGCCCTTTTTGCATTTGTTGACGGCATATTTGTATATCGAAGCCCTGATGGCGCTTTTTTTATTT<br/> AATCGATAACCAGA</p>                                                                                                                                                                                                                                                                                                                                                                                                                                     |
| #3                       | 3911814  | <p>TCGAGGTCGACGGTATCGATAAGTATGCTTAATAGCTGAGCTTTCGGCAATTA AAAAGCGGCTAACCCAGCCGCTTTTTTACGCTCGACTCGGTA<br/> CCAAATTCAGAAAAGAGGCTCCCGAAAGGGGGCGCTTTTTCGTTTTGGTCCGAAGTTCCTATTCTCTAGAAAAGTATAGGAAGTTCAGCGAAAAGGA<br/> CAATTGTCACAGGTCGAGGTGGCCGGCTCCATGCACCGCAGCAACCGGGGAGGCAGACAAGGTATAGGGCGGGCCATACATCCATGCCAACCCGTT<br/> CCATGTGCTCGCCGAGCCGATCAATTCGCGGTGACGATCAGCGGTCCAGTATCGAAGTTAGGCTGTTAAGAGCCGCGAGCGATCCTGAAAGCTGTCCCT<br/> GATGGTCTCATCTACCTGCTGGACAGCATGGCTGCAACCGGGCATCCCGATGCCCGGGAAGCGAGAAGATATAATGGGGAAGCCATCCAGCT<br/> CGGTCGCGAACCCGACGACGATGACCCAGCGGCTGGCCGCTATGCCGGGATTAATGGCTGCTTCTCGCGAAAAGTTTGGTGGGGGACCCAGTGAC<br/> GAAAGCTTGAGCGAGGGCCTGCAAGATTCCGAATACCGCAAGCAGGCCATCATCTCGCGCTCCAGCAAAAGCGCTTCCGCGAAAATGACCCAGA<br/> GCGCTGCCGACCTGTCTACGAGTTGCATGATAAAGAACAGTATAAGTGGCCCAATGTTATGCCCGCGCCACCGGAAGGAGCTGACTGGG<br/> TTGAAGGCTTCAAGGGCATCGGACGGCGCTCCCTTATGGGACTCCTGCATAGGAAGCAGCCAGTAGTAGGTTGAGGCGCTGAGCACCCGCGCCG<br/> AAGGAATGGTGCCTGCAAGGAGATGGCCGCAACAGTCCCGCGCACGGGGCTGCCACCATACCCAGCCGAAAACAAAGCGCTCATGAGCCCGAAGTGGC<br/> GAGCCGATCTCCCATCGGTGATGTCGGCGATATAGCGCAGCAACCGCACTGTGGCCCGGTGATGCCGGCCAGATGCGTCCGGCTAGAGAATC<br/> CACAGGACGGGTGTGGTCCCATGATCGGTAGTCGATAGTGGCTCCAAGTAGCGAAGCAGCAGGACTGGCCGGCGGCAAGCGGTCCGACAGTGTCTCC<br/> GAGAACGGGTGGCATAGAAATGCAATCAACGCATATAGCGTACGACACCCGATAGTGATGCGGATGCTGTCCGAAATGGAGATATCCCGCAAGGGC<br/> CCGCACTACCGCATAAACCAAGCTATGCCTACAGCATCCAGGTGACGTTGCCAGGATGAGGATGAGCGCATTTGTAGATTTCATACACGCTGCCGTA<br/> CTGGTTAGCAATTTAAGTGTATAAATACCGCATACAGTTTATCGATGATAAGCTGTCAAGAAAGTTCCTATTCCGAAGTTCCTATTCTCTAGAAAAGTA<br/> TAGGAAGTTCGAGCGCCGATCAGGAGTGGACGGCTGGGAGCGCTACAGCTGTGGCTGGGTGGGTGCTTCTTAAAAGAAACCTCCGATTTGGCGAG<br/> GTTTTCCGCTTTTGTACTCTGTGAAAGTAATCTTCCCGAGTGA AAAATGGCCGCAATCGGGCCGCTTTTTTATGCTTCCATTAGAAAAGCAAAAAGCC<br/> TGCTAGAAAAGCAGGCTTTTTGAAATTTGGCTCCTCTGACTGCATTTACGTTGACACCATCGAATGCCAAGCTAGCTTGGCGAGATCCTTGCAGCACATCCC<br/> CCTTTCGCAAGTGGCGTAATAGCAAGAGGCCCGCACCGATCGCAGGCC</p> |

- a. All landing pad sequences contain the antibiotic resistance marker.
- b. The nucleotide numbering is based on *E. coli* MG1655 K-12 (NCBI U00096.3)
- c. The following colors are used for annotations. Blue: Promoters; Purple: Ribozymes; Green: Repressors, YFP and Sensor ORFs; Red: Terminators; Orange: FRT sites and att sites; yellow highlight: RBSs; Gray highlight: antibiotic resistance gene, and origin of rep; Green highlight: Transposase (Tn5, Tn7) recognition sites

**Appendix Table 5: Sequence of genetic parts used in this study**

| Part Name          | Part Class | Part Sequence                                                                                                                                                                                                               |
|--------------------|------------|-----------------------------------------------------------------------------------------------------------------------------------------------------------------------------------------------------------------------------|
| P <sub>Badmc</sub> | Promoter   | AACGATCGTTGGCTGTAGCATTTTTATCCATAAGATTAGCGGATCTACCTGACGCTTTTTATCGCAACTCTCTATATTTTTCCATACCCG                                                                                                                                  |
| P <sub>Tet</sub>   | Promoter   | AACGATCGTTGGCTGTCCCTATCAGTGATAGAGATTGACATCCCTATCAGTGATAGATATAATGAGCAC                                                                                                                                                       |
| P <sub>Cin</sub>   | Promoter   | TGGTAGCACAAAAGTCCCTTTGTGCGTCCAAACGACGACGCGGCTCTAAAGCGGGTCCGATCTTTCAGATTGCTCCTCGCGCTTTCAGTCTTTGT<br>TTTTGGCCATGTCCTTATCGCAAAACCGCTGCACACTTTTGGCGACATGCTCTGATCCCCCTCATCTGGGGGGCCATCTGAGGGAATTTCCGATCC<br>GGCTCGCTGAACATTCTGCT |
| P <sub>CymRC</sub> | Promoter   | TTCCGATGTAGGAGTAACAAACAGACAATCTGGTCTGTTTGTATTATGGAAAATTTTTCTGTATAATAGATTCT                                                                                                                                                  |
| P <sub>Ttg</sub>   | Promoter   | TACGCTGCCACGTGTCACCCAGCAGTATTTACAACAACCATGAATGTAAGTATATTCCTTAGCAA                                                                                                                                                           |
| P <sub>Tac</sub>   | Promoter   | AACGATCGTTGGCTGTGTTGACAATTAATCATCGGCTCGTATAATGTGTGGAATTTGAGCGCTCACAATT                                                                                                                                                      |
| P <sub>VanCC</sub> | Promoter   | GAGCCTACCTGCCTATTGGATCCAATTGACAGCTAGCTCAGTCTAGGTACCATTGGATCCAAT                                                                                                                                                             |
| P <sub>AmtR</sub>  | Promoter   | CTTGCCAAACCAATGATTCTGTTACCTTTGACAGTTTCTATCGATCTATAGATAATGCTAGC                                                                                                                                                              |
| P <sub>AmeR</sub>  | Promoter   | TGCTACTAGAGGGCGATAGTGACAACCTTGACAACCTCATCACTTCTACGTAGGCTGCTAGC                                                                                                                                                              |
| P <sub>PhIF</sub>  | Promoter   | CGACGTACGGTGAATCTGATTTCCATTGACATGATACGAAACGTACCGTATCGTTAAGTT                                                                                                                                                                |
| P <sub>QacR</sub>  | Promoter   | GGTATGGAAGCTATACGTTACCAATTGACAGCTAGCTCAGTCTACTTTAGTATATAGACCGTGGGATCGGCTCTATA                                                                                                                                               |
| P <sub>BetI</sub>  | Promoter   | AGCGGGGTGAGAGGGATTCTGTTACCAATAGACAATTGATTGGACGTTCAATATAATGCTAGC                                                                                                                                                             |
| P <sub>BM3R1</sub> | Promoter   | AACGAATGGCTCATGTCGATTCTGTTACCAATTGACGGAATGAACGTTCAATCCGATAATGCTAGC                                                                                                                                                          |
| P <sub>HlyIR</sub> | Promoter   | ACCAGGAATCTGAACGATTCTGTTACCAATTGCCATATTTAAATTTCTGTTTAAATGCTAGC                                                                                                                                                              |
| P <sub>LacI</sub>  | Promoter   | TGGTGCAAAACCTTTCCGCGTATGGCATGATAGCGCCCGAAGAGAGTCAATTCAGG                                                                                                                                                                    |
| P <sub>Lux2</sub>  | Promoter   | ATAGCTTCTTACCGGACCTGTAGGATCGTACAGGTTTACGCAAGAAAATGGTTTGTATTTCGAATAAA                                                                                                                                                        |
| BBa_J23105         | Promoter   | GAAGACGCGGAGGAGACCGGCGCCCTTACGGCTAGCTCAGTCTAGTACTATGCTAGCAAGGT                                                                                                                                                              |
| BBa_J23104         | Promoter   | GCTTCAAATCGCGATTGACAGCTAGCTCAGTCTAGTATTGTGCTAGC                                                                                                                                                                             |
| BBa_J23119         | Promoter   | GAATCGCACCAAGACAGGTTTGTCCATTGACAGCTAGCTCAGTCTAGTATAATGCTAGC                                                                                                                                                                 |
| BBa_J23101         | Promoter   | GATAAGTCCCTAACTTTTACAGCTAGCTCAGTCTAGTATTATGCTAGC                                                                                                                                                                            |
| Tn7L               | att sites  | AACCAGTAAGTGAATCTAGTTCCAAACTATTTGTCAATTTTAAATTTTCGTATTAGCTTACGACGCTACACCCAGTCCCATCTATTTTGTCACTCT<br>TCCCTAAATAATCCTTAAAACTCCATTTCCACCCCTCCAGTTCACCACTATTTTGTCCGCCACA                                                        |
| Tn7R               | att sites  | TGTGGCGGACAATAAAGTCTTAAACTGAACAAAATAGATCTAAACTATGACAATAAAGTCTTAAACTAGACAGAATAGTTGTAAGTGAATCAGTCC<br>AGTTATGCTGTGAAAAGCATACTGGACTTTGTTATGGCTAAAGCAAACCTCTCATTTTCTGAAGTCAAAATGCCGCTGATTAAAGAGGGGCGTG<br>G                     |
| attR2              | att sites  | GGACGGCGCAGAAGGGAGTAGCTCTTCGCCGAGAAGTCTGCAAGGCACTGCTCTGGCT                                                                                                                                                                  |
| attR5              | att sites  | GCACCGACCCGACCCACAGCGTGTAGCGCTCCAGGCGTCCACTCCCTGATCCGGCGCTC                                                                                                                                                                 |
| attR7              | att sites  | GTGTTATAAACCTGTGTGAGAGTTAAGTTTACATGGCAAAGTTGATGACCGGGTCCGCGTT                                                                                                                                                               |
| attL2              | att sites  | GCTCATGTATGTGTCTACGCGAGATTCTCGCGGACCGTGCACATACTGCTCAGCTCGTC                                                                                                                                                                 |
| attL5              | att sites  | GCACCGACCCGACCCACAGCGTGTAGCGCTCCAGGAGAGTTATCGACTTGCATATTAGGG                                                                                                                                                                |
| attL7              | att sites  | AGACGAGAAACGTTCCGTCCTGTTGCTCAGTTGCTAACCTTAACTTTTACGAGGTTGAGTT                                                                                                                                                               |
| attB2              | att sites  | GACGAGCTGAGCAGTATGTCGACGCTCCGGCAAGAGTACTCCCTTCTGCGCCGCTCC                                                                                                                                                                   |
| attP2              | att sites  | GCTCATGTATGTGTCTACGCGAGATTCTCGCCGAGAAGTCTGCAAGGCACTGCTCTGGCT                                                                                                                                                                |
| attB5              | att sites  | GAGCGCCGATCAGGGAGTGGACGCGCTGGGAGCGCTACACGCTGTGGCTCGGTCGGTGC                                                                                                                                                                 |
| attP5              | att sites  | CCCTAATACGCAAGTCGATAACTCTCCTGGGAGCGTTGACAACCTTGGCACCCTGATCTG                                                                                                                                                                |
| attB7              | att sites  | AGACGAGAAACGTTCCGTCCTGTTGCTCAGTTGGGCAAGTTGATGACCGGGTCTGCGTT                                                                                                                                                                 |
| attP7              | att sites  | GTGTTATAAACCTGTGTGAGAGTTAAGTTTACATGCCTAACCTTAACTTTTACGAGGTTGAGTT                                                                                                                                                            |
| FRT                | FRT        | GAAGTTCCTATTCTCTAGAAAGTATAGGAATTC                                                                                                                                                                                           |
| A1                 | RBS        | AATGTTCCCTAATAATCAGCAAGAGGTTACTAG                                                                                                                                                                                           |
| F2                 | RBS        | ACGCTATGGACTATGTTTCAAACAGGAGCTAATAG                                                                                                                                                                                         |
| B3                 | RBS        | CCAAACGAGGCGGGAGG                                                                                                                                                                                                           |
| E0                 | RBS        | CCCCCGAGGAGTAGCAC                                                                                                                                                                                                           |
| E1                 | RBS        | CCTTCCGAGGAGGAGCACA                                                                                                                                                                                                         |
| P1                 | RBS        | CTATGGACTATGTTTAAAGGGGAGAAATACTAG                                                                                                                                                                                           |
| P2                 | RBS        | GGAGCTATGGACTATGTTTAAAGGCTGAAATACTAG                                                                                                                                                                                        |
| P3                 | RBS        | CTTTACGAGGGCGATCCT                                                                                                                                                                                                          |
| H1                 | RBS        | ACCCCGAG                                                                                                                                                                                                                    |
| V1                 | RBS        | AAGACCATTATAAGGTTTGAACCT                                                                                                                                                                                                    |
| BBa_B0032          | RBS        | TCACACAGGAAAGTACTAG                                                                                                                                                                                                         |
| BBa_B0064          | RBS        | TACTAGAGAAAGAGGGAATACTAG                                                                                                                                                                                                    |
| BBa_B0034          | RBS        | TACTAGAGAAAGAGGGAATACTAG                                                                                                                                                                                                    |
| AraJ               | Ribozyme   | AGTGGTCTGATCTGAAACTCGATCACCTGATGAGCTCAAGGCAGAGCGAAACCCCTACAAATAATTTGTTTAA                                                                                                                                                   |
| SarJ               | Ribozyme   | AGACTGTCCCGGATGTGTATCCGACCTGACGATGGCCAAAAGGGCCGAAACAGTCTCTACAAATAATTTGTTTAA                                                                                                                                                 |
| RibolJ00           | Ribozyme   | AGCTGTACCCGATGTGCTTTCCGGTCTGATGAGTCCGTGAGGACGAAACAGCCTCTACAAATAATTTGTTTAA                                                                                                                                                   |









|             |                     |                                                                                                                                                                                                                                            |
|-------------|---------------------|--------------------------------------------------------------------------------------------------------------------------------------------------------------------------------------------------------------------------------------------|
| <i>oriT</i> | Conjugation element | CTTTCCGGTGCATAACCCCTGCTTCGGGGTCATTATAGCGATTTTTTCGGTATATCCATCCTTTTTGCACGATATACAGGATTTGCCAAAGGGTTCG<br>TGTAGACTTTCCTGGTGTATCCAACGGCGTCAGCCGGGCAGGATAGGTGAAGTAGGCCACCCGCGAGCGGGTGTTCCTTCTCACTGTCCCTTATTC<br>GCACCTGGCGGTGCTCAACGGGAATCCTGCTCT |
|-------------|---------------------|--------------------------------------------------------------------------------------------------------------------------------------------------------------------------------------------------------------------------------------------|







|  |  |                                                                                                                                                                                                                                                                                                                                                                                                                                                                                                                                                                                                                                                                                                                                                                                                                                                                                                                                                                                                                          |
|--|--|--------------------------------------------------------------------------------------------------------------------------------------------------------------------------------------------------------------------------------------------------------------------------------------------------------------------------------------------------------------------------------------------------------------------------------------------------------------------------------------------------------------------------------------------------------------------------------------------------------------------------------------------------------------------------------------------------------------------------------------------------------------------------------------------------------------------------------------------------------------------------------------------------------------------------------------------------------------------------------------------------------------------------|
|  |  | <p>TCAAGTGAGAAATCACCATGAGTGACGACTGAATCCGGTGAGAATGGCAAAGCTTATGCATTTCTTCCAGACTTGTCAACAGGCCAG<br/> CCATTACGCTCGTCATCAAATCACTCGCATCAACCAACCGTTATTCATTCTGATTGCGCCTGAGCGAGACGAAATACGCGATCGCTG<br/> TTAAAAGGCAATTTACAAACAGGAATCGAATGCAACCGGGCAGGAACACTGCCAGGCGATCAACAATATTTTACCTGAATCAGGATAT<br/> TCTTCTAATACCTGGAATGCTGTTTTCCCGGGGATCGCAGTGGTGAGTAACCATGCATCATCAGGAGTACGGATAAAATGCTTGATGGTC<br/> GGAAGAGGCATAAATTCGGTCAGCCAGTTTAGTCTGACCATCTCATCTGTAACATCATTTGGCAACGCTACCTTTGCCATGTTTCAGAAAC<br/> AACTCTGGCGCATCGGGCTTCCCATACAATCGATAGATTGTGCGACCTGATTGCCCGACATTATCGCGAGCCCATTTATACCCATATAAA<br/> TCAGCATCCATGTTGGAATTTAATCGCGGCCCTCGAGCAAGACGTTTCCCGTTGAATATGGCTCAAAACCCCTTGATTAATGTTTATG<br/> TAAGCAGACAGTTTTATGTTTCATGATGATATATTTTATCTTGTGCAATGTAACATCAGAGATTTGAGACACACGTTGGCTTTGTTGA<br/> ATAAATCGAATTTTCTGAGTTGAAGGATCAGATCACGCATCTTCCGACACGACGACCGTTCCGTGGCAAAGCAAAGTTCAAATC<br/> ACCAACTGGTCCACCTACAACAAAGCTCTCATCAACCGTGGCTCCCTCACTTTCTGGCTGGATGATGGGGCATTCAGGCCTGGTATGAG<br/> TCAGCAACACCTTCTTACGAGGCAGACCTCAGCGC</p> |
|--|--|--------------------------------------------------------------------------------------------------------------------------------------------------------------------------------------------------------------------------------------------------------------------------------------------------------------------------------------------------------------------------------------------------------------------------------------------------------------------------------------------------------------------------------------------------------------------------------------------------------------------------------------------------------------------------------------------------------------------------------------------------------------------------------------------------------------------------------------------------------------------------------------------------------------------------------------------------------------------------------------------------------------------------|

- a. *Annotation colors. Blue: Promoters; Purple: Ribozymes; Green: Repressors, YFP and Sensor ORFs; Red: Terminators; Orange: FRT sites and att sites; yellow highlight: RBSs; Gray highlight: antibiotic resistance gene and origin of rep; Green highlight: Transposase (Tn5, Tn7) recognition sites*





Table with 2 columns: Sequence ID (YJP\_MKC108\_LP#1) and DNA sequence. The sequence contains numerous highlighted regions in yellow and red, indicating specific motifs or mutations. The text is a long string of nucleotides (A, C, G, T) with various annotations.

|                 |                                                                                                                                                                                                                                                                                                                                                                                                                                                                                                                                                                                                                                                                                                                                                                                                                                                                                                                                                                                                                                                                                                                                                                                                                                                                                                                                                                                                                                                                                                                                                                                                                                                                                                                                                                                                                                                                                                                                                                                                                                                                                                                                                                                                                                                                                                                                                                                                                                                                                                                                                                                                                                                                                                                                                                                                                                                                                                                                                                                                                                                                                                                                                                                                                                                                                             |
|-----------------|---------------------------------------------------------------------------------------------------------------------------------------------------------------------------------------------------------------------------------------------------------------------------------------------------------------------------------------------------------------------------------------------------------------------------------------------------------------------------------------------------------------------------------------------------------------------------------------------------------------------------------------------------------------------------------------------------------------------------------------------------------------------------------------------------------------------------------------------------------------------------------------------------------------------------------------------------------------------------------------------------------------------------------------------------------------------------------------------------------------------------------------------------------------------------------------------------------------------------------------------------------------------------------------------------------------------------------------------------------------------------------------------------------------------------------------------------------------------------------------------------------------------------------------------------------------------------------------------------------------------------------------------------------------------------------------------------------------------------------------------------------------------------------------------------------------------------------------------------------------------------------------------------------------------------------------------------------------------------------------------------------------------------------------------------------------------------------------------------------------------------------------------------------------------------------------------------------------------------------------------------------------------------------------------------------------------------------------------------------------------------------------------------------------------------------------------------------------------------------------------------------------------------------------------------------------------------------------------------------------------------------------------------------------------------------------------------------------------------------------------------------------------------------------------------------------------------------------------------------------------------------------------------------------------------------------------------------------------------------------------------------------------------------------------------------------------------------------------------------------------------------------------------------------------------------------------------------------------------------------------------------------------------------------------|
|                 | <p>TAATTGCTCTTTTAAACAGCACCACGATTTTCGCTCGCTCAGGCGCAATACAGTAATGAATAACGGTTTGGTTGATGCGAGTGATTTTATGATGACGAGCGTAAATGG<br/> CGGGCTTTGAACAAGCTGTGAAAGAAATGCATAAACTTTTGCATTTCCAGCGATTCAGTCGCTACTGAGGTAATTTTCACTGATATAACTTTTGA<br/> CGAGGGAATTAATAGTTGATTTGATGTTGGACGAGTCCGAATCCGACAGCATACCAGATCTTCCCATCTATCGAAGTCCGCTCGGTGAGTTTTCCTCCCTC<br/> ATTACAGAAACGGCTTTTCAAAAATATGGTATGATAATCCTGATATGAATAAATGCAAGTTTTCATTGATGCTCGAGTGTGTTTCAAAAGCTCGCTTGACT<br/> CCTGTTGATAGTCCAGTAATGACCTCAGAACTCCATCTGGATTGTTGCAGAACCTCGGTTGCCGGGGCGTTTTATTTGGTGAAGTCCCAAGCACAAGTTTC<br/> ACGTACTAAGCTCTCATGTTTAACTGTAAGCTCTCATGTTTAAACGAATTAACCCCTCATGGCTAACGTAAGCTTCTCATGGCTAAGCTAAGCTCTCAT<br/> GTTTACAGTAACTAAGCTCTCATGTTTAAACGAATAAAATAAATAAATCAGCAACTTAAATAGCCTTAAAGGTTTAAAGTTTATAAGAAAAAAGAAATATA<br/> AGCTTTTAAAGCTTTAAAGTTTAAAGCTTTGGACAACAAGCCAGGATGTAACGCACTGAGAAGCCCTTAGACGCTTCAAAAGCAATTTTGGATGACACAGG<br/> AACACTTAAAGGCTGACATGGGAATTAGCCATGGGCCGTGGCAATCATTTTAAAGTTTCCGGCTTTTGGCTGATGTTTCTTCCGCTGCTCGGCTGG<br/> ATAACCTTATCCCGCTGGACAAACGAAAAACCCCTTTCGGGTGCTTTTTCGGAATTTGGTACCAGGCTTTGGTGGAAAAAAGCCGACCTGCA<br/> GTCGGGCTTTTCTGCTTTCCAGCAAGAGCAGTCCCTTCAGAAAGTTCCCGGGCAAGAGCTACTCCCTCTTCGGCCGAAAGTTCCTATACTTTCT<br/> AGAGATTAGAACTTCGGACAAACGAAAAACCCCTTTCGGGTGCTTTTCTGGAATTTGGTACCAGGCTTTGGTGGAAAAAAGCCGACCTGTCAGG<br/> TGGGGCTTTTCTGCTTTCCGTTAACAGCGCAGAACAAGCAGGATGTTGACGGGGCGGCTCAAG</p>                                                                                                                                                                                                                                                                                                                                                                                                                                                                                                                                                                                                                                                                                                                                                                                                                                                                                                                                                                                                                                                                                                                                                                                                                                                                                                                                                                                                                                                                                                                                                                                                                                                                                                                                                                                                                                                                                                               |
| YJP_MKC110_LP#1 | <p>AAAAAAAAACCCCGCTGTACAGGGCGGGTTTTTTTTTTTTTTTTTTTTTTTTTTTTTGGGTATAGCGTCGTGGACAGTCATTATCTTTCTGCCCCC<br/> CGAAGCGGGTTTTTACGTAATCAGGTAAACTGACCATAAGCCGGGAGCAGCTGAGCAGTATGTCAGCGGTCGGGGAGAATCTCGCGTAGACACATACATGA<br/> GCTTACTTGTACAGCTCGTCCATGCCAGAGTGTATCCCGGGCGGCTCAGCAACTCCAGCAGGACCATGTGATCGCGCTTCTCGTTGGGGTTTTTCTGAG<br/> GACTGTTAGCTAAGGTAGTGTGTGTCCGCGCAGCAGCAGGCGGCTCGCCGATTTGGGTGTTCTGCTGTTAGTGGTGGCGACTGACGCTCGCCTCTCATG<br/> TTTCCGCGGATCTTGAAGTTCACCTTGATCCGCTTCTCTGCTTTGTCGGCATGATATAGACCTTTGGCTGTTTACTGCTACTGCTCCGACGATGTC<br/> TTGCGCTCCTCTTGAAGTCGATGCCCTTCAGCTCGATGCGGTTACCCAGGTTTCACCGGTTTCGCCCTCGAACTTCACCTCGCCGCGGTTTGTAGTTCGCGT<br/> AAGAAGTGGTGGCTCTTCGACGTAGCCTTTCGGCATGGCGGACTTGAAGAAGTCTGTCAGCTTCTATGTTGTTGGAAAGCCGATGGCCAGAGTGTGTTT<br/> CCGAAGTGGTTCAGAGGTTGGCCAGGGCAGCCAGCTTTCGCTGTGGTGCAATGAACTTCAAGGTCAGCTTTCCGCTAGGCTGAGCCTCGCCCTCGCCG<br/> GACAGCTGAACTTTGCGCGTTTACCTCGCGCTCCAGCTCGACAGGATGGGCACCACCCCGGTGAACAGCTTCTCGCCCTTGTCCACACTTAGTATTTCTC<br/> <b>TCCTTCTAGTA</b>TTAAACAAAATTTTGTAGAGGCTTTTCGCTTCCGCTCAGCACTCATCAGCCGGAAGACACATCCGGTACAGCTCGGGTATGGAAAAAT<br/> ATAGAGTTCGGATAAAAAGCCTCAGGTAGGATCCGCTAATCTTATGGATAAAAATGCTACAGCCACAGATCGTTTCCTGGCTTCCAGTACAATCTGCTCTG<br/> ATGCCCTCGACTCGCCGCACTAGTGTCCAGCGGAGCTCGAATTCGGATCCGAAGTCCGAAGTCCCTATACTTTCTAGAGAAATAGGAATTCGGAAATAGGAATCTATCT<br/> TATAGTTAATGTCATGATAAATAGTGTCTTAGACCATGCCATTTGTTTATTTTTCTAAATACATCAAATATGATCCGCTCATGAGACAATAACCCGTAT<br/> AATGCTTCAATAAATTAAGAAAGGAGGATATGAGCCATTTCAACGGGAAGGACTGTTGCTTAGCCGCGATTAATTAACCATGGATGCTGATTTATATG<br/> GGTATAAATGGGCTCGCATATGTCGGGAAATCAGGTGGGCAAACTATCATGATGATGGAAGCCGATGGCCAGAGTGTGTTTCTGAAACATGGAAAAAGTA<br/> CGCTTGCATATGATTTACAGATGAGTGGTGCAGCTAACTGGCTGACGGAAATTTATGCTTCCGACCATCAAGCAATTTATCCGATCTCTGATGATGAT<br/> GGTTACTCACCACCTCGCATCCCGGAAAAACAGCATCCAGGTATTAAGAATAATCCTGATTCAGGTGAAATAATTTGATGAGCGTGGCAATCTCTCCGCGC<br/> GATTGCACTCGATCCCTGTTTGAATTTGCTTTTAAACAGCAGCGCTATTTTCGCTCGCTCAGCGCAATCAGCAATGAAATAGGATTTGGTGTGATGCGAGT<br/> TTTTGATGACGAGTAAATGGTGGCTGTGTAACAAGCTCGAAAGAAATGATAAATTTTGCCATTTCCAGCTTCCAGGATTCAGCTCGCATGATGGATTTCT<br/> CACTTGATACCTTTATTTTTCAGCAGGGAAATTAATAGTTGATTTGATGTTGGAAGTTCGGAATCCGACAGGATACCAGATCTTCCGACTCTATGGAAT<br/> GCTCGGTGAGTTTTCTCCTTACACAGAAACGGCTTTTTCAAAAATATGGTATGATAATCCTGATATGAATAAATGCGTTTCAATTTGATGCTCGATGAGT<br/> TTTTCTAAAGCTCGCTTGGACTCCTGTTGATAGCCTCAGTAATGACCTCAGAACTCCATCTGGAATTTGTCAGAACGCTCGGTTTGGCCGCGGGCTTTTTATTTG<br/> TGAGAAATCCAAAGCACAAGTTACGTAATAAGCTCTCATGTTTAACTGTAAGCTCTCATGTTTAAACGAATTAACCCCTCATGGCTAAGCTAAGCTAAGCTCT<br/> GGTAACCTACTAAGCTCTCATGTTTACGTAATAAGCTCTCATGTTTAAACGAATAAATAAATAAATAAATAAATAAATAAATAAATAAATAAATAAATAA<br/> ATAAGAAAAAAGAAATATAAAGCTTTTAAAGCTTTTAAAGCTTTAAAGCTTTTAAAGCTTTTAAAGCTTTTAAAGCTTTTAAAGCTTTTAAAGCTTTT<br/> AACCAATTTGAGTGGACAGGAAACACTTAAACGGTGCATGGGAATTAGCCATGGGCCGTGGCAATCATTTTAAAGTTTCCGGCTTTTCTGGCTTTTTCG<br/> TCCATGTTCTTTCTGCTGGATAACCGTATACCGCTGGACAAACGAAAAACCCCTTTCGGGTGCTTTTCTGGAATTTGGTACCAGGCTTTGGCG<br/> AAAAAAAAGCCGCACTGACAGGTGGCGCTTTTTCTGCTTTCCAGCAAGAGCAGTCCCTTCGAAAGTTCCTCGGCGAAGCTACTCCCTTTCTGCGCC<br/> GTCCGAAGTTCCTATACTTTCTAGAGAAATAGGAATTCGGACAAACGAAAAACCCCTTTCGGGTGCTTTTCTGGAATTTGGTACCAGGCTTTGGTGGCA<br/> AAAAAAGCCGCACTGACAGGTGGCGCTTTTTCTGCTTTCCCGTTTAAACAGCGCAGAACAAGCAGGATGTTGACCGGGCGGCTCAAG</p> |
| YJP_MKC111_LP#1 | <p>AAAAAAAAACCCCGCTGTACAGGGCGGGTTTTTTTTTTTTTTTTTTTTTTTTTTTTTGGGTATAGCGTCGTGGACAGTCATTATCTTTCTGCCCCC<br/> CGAAGCGGGTTTTTACGTAATCAGGTAAACTGACCATAAGCCGGGAGCAGCTGAGCAGTATGTCAGCGGTCGGGGAGAATCTCGCGTAGACACATACATGA<br/> GCTTACTTGTACAGCTCGTCCATGCCAGAGTGTATCCCGGGCGGCTCAGCAACTCCAGCAGGACCATGTGATCGCGCTTCTCGTTGGGGTTTTTCTGAG<br/> GACTGTTAGCTAAGGTAGTGTGTGTCCGCGCAGCAGCAGGCGGCTCGCCGATTTGGGTGTTCTGCTGTTAGTGGTGGCGACTGACGCTCGCCTCTCATG<br/> TTTCCGCGGATCTTGAAGTTCACCTTGATCCGCTTCTCTGCTTTGTCGGCATGATATAGACCTTTGGCTGTTTACTGCTACTGCTCCGACGATGTC<br/> TTGCGTCTCCTTTGAAGTCGATGCCCTTCAGCTCGATGCGGTTACCCAGGTTTCACCGGTTTCGCCCTCGAACTTCACCTCGCCGCGGTTTGTAGTTCGCGT<br/> AAGAAGTGGTGGCTCTTCGACGTAGCCTTTCGGCATGGCGGACTTGAAGAAGTCTGTCAGCTTCTATGTTGTTGGAAAGCCGATGGCCAGAGTGTGTTT<br/> CCGAAGTGGTTCAGAGGTTGGCCAGGGCAGCCAGCTTTCGCTGTGGTGCAATGAACTTCAAGGTCAGCTTTCCGCTAGGCTGAGCCTCGCCCTCGCCG<br/> GACAGCTGAACTTTGCGCGTTTACCTCGCGCTCCAGCTCGACAGGATGGGCACCACCCCGGTGAACAGCTTCTCGCCCTTGTCCACACTTAGTATTTCTC<br/> <b>TCCTTCTAGTA</b>TTAAACAAAATTTTGTAGAGGCTTTTCGCTTCCGCTCAGCACTCATCAGCCGGAAGACACATCCGGTACAGCTCGGGTATGGAAAAAT<br/> ACTGATAGGATGTCATCTCTATCAGTATAGGACAGCAAGCAGTCTTCTGCTTCCAGTACAATCTGCTTGTAGCCCTCGAATGAGCGGGCGCCTACTA<br/> TCTGCGAGGATCCGAATTCGGATCCGAAGTCCGAAGTCCCTATACTTTCTAGAGAAATAGGAATTCGGAAATAGGAATCTATCTTTTATAGCTTGAATG<br/> TGTGTTCTTAGACCATGCCATTTGTTTATTTTTCTAAATACATCAAATATGATCCGCTCATGAGACAATAACCCGTATAAATGCTTCAATAATATTAAGAAA<br/> GGAAGATATAGGCAATTTCAACGGGAAAGCTTTTGTCTTAGCCGCGATTAATTAACCAATGGATGCTGATTTATGGGTATTAATGGGCTCGGATAATG<br/> TCGGGCAATCAGGTGCACAATCTATGATTTGGAAGCCGATCGCCAGAGTGTGTTTCTGAAACATGGCAAGTGGCTTGGCAATGATGTACAGATG<br/> AGATGTTAGACTAACTGGCTGACGAAATTTATGCTTCCGACCATCAAGCAATTTTATCCGATCTCCTGATGATGATGATGATGATGATGATGATGATGAT<br/> GGAAACAGCAATCCAGGATTTAGAAGAAATCTGATTCAGGTGAAATAATGTTGATGCGCTGGCAGTGTGTTGATGCGCTGGCAGTGTGATGCGGCTG<br/> ATTGCTTTTAAAGCTTTTAAAGCTTTAAAGCTTTTAAAGCTTTTAAAGCTTTTAAAGCTTTTAAAGCTTTTAAAGCTTTTAAAGCTTTTAAAGCTTTT<br/> CACTTAAAGGCTGACATGGGAATTAGCCATGGGCCGTGGCAATCATTTTAAAGTTTCCGGCTTTTCTGGCTTTTCTGCAATTTGATGATGATGATGAT<br/> AACCGTATTCACCGCTGGACAAACGAAAAACCCCTTTCGGGTGCTTTTCTGGAATTTGGTACCAGGCTTTGGTGGAAAAAAGCCGACCTGTCAGG<br/> TGGGGCTTTTTCTGCTTTCCAGCAAGAGCAGTCCCTTCAGAAAGTTCCTCGGCGAAGGCTACTCCCTTTCTGCGCCGCGGAAGTTCCTATACTTTCTAG<br/> AGAAATAGGAATTCGGACAAACGAAAAACCCCTTTCGGGTGCTTTTCTGGAATTTGGTACCAGGCTTTGGTGGAAAAAAGCCGACCTGTCAGGCT<br/> CGGGCTTTTTCTGCTTTCCCGTTTAAACAGCGCAGAACAAGCAGGATGTTGACCGGGCGGCTCAAG</p>                                                                                                                                                                                                                                                                                                                                                                                                                                                                                                                                                                                                                                                                                                                                                                                                                       |
| YJP_MKC112_LP#1 | <p>AAAAAAAAACCCCGCTGTACAGGGCGGGTTTTTTTTTTTTTTTTTTTTTTTTTTTTTGGGTATAGCGTCGTGGACAGTCATTATCTTTCTGCCCCC<br/> CGAAGCGGGTTTTTACGTAATCAGGTAAACTGACCATAAGCCGGGAGCAGCTGAGCAGTATGTCAGCGGTCGGGGAGAATCTCGCGTAGACACATACATGA<br/> GCTTACTTGTACAGCTCGTCCATGCCAGAGTGTATCCCGGGCGGCTCAGCAACTCCAGCAGGACCATGTGATCGCGCTTCTCGTTGGGGTTTTTCTGAG<br/> GACTGTTAGCTAAGGTAGTGTGTGTCCGCGCAGCAGCAGGCGGCTCGCCGATTTGGGTGTTCTGCTGTTAGTGGTGGCGACTGACGCTCGCCTCTCATG<br/> TTTCCGCGGATCTTGAAGTTCACCTTGATCCGCTTCTCTGCTTTGTCGGCATGATATAGACCTTTGGCTGTTTACTGCTACTGCTCCGACGATGTC<br/> TTGCGTCTCCTTTGAAGTCGATGCCCTTCAGCTCGATGCGGTTACCCAGGTTTCACCGGTTTCGCCCTCGAACTTCACCTCGCCGCGGTTTGTAGTTCGCGT<br/> AAGAAGTGGTGGCTCTTCGACGTAGCCTTTCGGCATGGCGGACTTGAAGAAGTCTGTCAGCTTCTATGTTGTTGGAAAGCCGATGGCCAGAGTGTGTTT<br/> CCGAAGTGGTTCAGAGGTTGGCCAGGGCAGCCAGCTTTCGCTGTGGTGCAATGAACTTCAAGGTCAGCTTTCCGCTAGGCTGAGCCTCGCCCTCGCCG<br/> GACAGCTGAACTTTGCGCGTTTACCTCGCGCTCCAGCTCGACAGGATGGGCACCACCCCGGTGAACAGCTTCTCGCCCTTGTCCACACTTAGTATTTCTC<br/> <b>TCCTTCTAGTA</b>TTAAACAAAATTTTGTAGAGGCTTTTCGCTTCCGCTCAGCACTCATCAGCCGGAAGACACATCCGGTACAGCTCGGGTATGGAAAAAT<br/> AAATTTTCCATAATCAACAGACAGATGTCGTTGTTTACTCTCTATCGGAATCCTGCTTCCAGTACAATCTGCTTGTATGCCCTCGACTGCTCGCCGCGC<br/> ACTAGTGTCCAGGAGCTCGAATTCGGATCCGAAGTCCCTATACTTTCTAGAGAAATAGGAATTCGGAAATAGGAATCTATCTTTTATAGTTAATGTCATGATA<br/> ATAAGTTTCTTAGACCATGCCATTTGTTTATTTTTCTAAATACATCAAATATGATCCGCTCATGAGACAATAACCCGTATAAATGCTTCAATAAATATTAAG<br/> AAAAGGAGGATATGAGCCATTTCAACGGGAAAGCTTTGCTTAGCCGCGATTAATTAACCAATGGATGCTGATTTATGGGTATTAATGGGCTCGGATAGG<br/> AATGTCGGGCAATCAGGTGCACAATCTATGATTTGGAAGCCGATGGCCAGAGTGTGTTTCTGAAACATGGCAAGTGGCTTGGCAATGATGATGATGATG<br/> GATGAGATGGTGCAGCTAACTGGCTGACGGAAATTTATGCTTCCGACCATCAAGCAATTTATCCGATCTCTGATGATGATGATGATGATGATGATGATG<br/> CCGGAAGAACAGCATTCAGGATTAAGAAGAAATCTGATTCAGGTGAAATAATGTTGATGCGCTGGCAGTGTGTTGATGCGCTGGCAGTGTGATGCGGCT<br/> TGTAATTTGCTTTTAAACAGCAGCGCTATTTGCTTCCGCTCAGCGCAATCAGCAATGAAATAGCGTTTGGTGTGATGCGAGTGTGATGATGACAGGAAATG<br/> GCTGCGCTGTGAAACAAGTTCGAAAGAAATGCAATAAATTTGCCATTTCCAGCCGATTCAGCTGCTCACTGATGGTATTTCTACTTACTGATGATGATGAT<br/> GACGAGGGGAAATTAATAGTGTGATTTGATGTTGAGCAGTTCGGAATCCGACAGGATACCAGGATCTTCCCATCTATGGAACCTCGCTCGGTGAGTTTTCTCCT<br/> TCATACAGAAACGGCTTTTCAAAAATATGGTATTTGATAATCCTGATATGAATAAATGCAAGTTTCATTGATGCTCGATGAGTTTTCTAAAGCTCGCTTGG</p>                                                                                                                                                                                                                                                                                                                                                                                                                                                                                                                                                                                                                                                                                                                                                                                                                                                                                                                                                                      |

|                |                                                                                                                                                                                                                                                                                                                                                                                                                                                                                                                                                                                                                                                                                                                                                                                                                                                                                                                                                                                                                                                                                                                                                                                                                                                                                                                                                                                                                                                                                                                                                                                                                                                                                                                                                                                                                                                                                                                                                                                                                                                                                                                                                                                                                                                                                                                                                                                                                                                                                                                                                                                                                                                                                                                                                                                                                                                                                                                                                                                                                                                                                                                                                                                                                                                                                                                                                                                                                                                                                                                   |
|----------------|-------------------------------------------------------------------------------------------------------------------------------------------------------------------------------------------------------------------------------------------------------------------------------------------------------------------------------------------------------------------------------------------------------------------------------------------------------------------------------------------------------------------------------------------------------------------------------------------------------------------------------------------------------------------------------------------------------------------------------------------------------------------------------------------------------------------------------------------------------------------------------------------------------------------------------------------------------------------------------------------------------------------------------------------------------------------------------------------------------------------------------------------------------------------------------------------------------------------------------------------------------------------------------------------------------------------------------------------------------------------------------------------------------------------------------------------------------------------------------------------------------------------------------------------------------------------------------------------------------------------------------------------------------------------------------------------------------------------------------------------------------------------------------------------------------------------------------------------------------------------------------------------------------------------------------------------------------------------------------------------------------------------------------------------------------------------------------------------------------------------------------------------------------------------------------------------------------------------------------------------------------------------------------------------------------------------------------------------------------------------------------------------------------------------------------------------------------------------------------------------------------------------------------------------------------------------------------------------------------------------------------------------------------------------------------------------------------------------------------------------------------------------------------------------------------------------------------------------------------------------------------------------------------------------------------------------------------------------------------------------------------------------------------------------------------------------------------------------------------------------------------------------------------------------------------------------------------------------------------------------------------------------------------------------------------------------------------------------------------------------------------------------------------------------------------------------------------------------------------------------------------------------|
|                | <p>CTCCTGTTGATAGATCCAGTAAAGACCTCAGAAGCTCCATCTGGATTTGTTAGCAACGCTCGGTTGCGGCGGGGCGTTTTTATTGGTGAATCCAAGCACAAGT<br/> TCACGTTAAAGCTCFCATGTTAAAGCTACTAAGCTCFCATGTTAAAGCAATAAATAATATAAATCAGCAACTTAAATAGCCCTCAAGGTTTAACTTTATAAGAAAATAAAGAAATATA<br/> ATGTTTACAGTACTAAGCTCFCATGTTGAACAATAAATAAATAAATCAGCAACTTAAATAGCCCTCAAGGTTTAACTTTATAAGAAAATAAAGAAATATA<br/> TAAGGCTTTAAAGCTTTAAAGGTTAAAGGTTTAAAGGTTTGGGCAACAAGCCAGGATGTAACGCCTGAGAAGCCCTTAGAGCCCTCAAGCAATTTTGATGACACA<br/> SGAACACTTAAAGGCTGACATGGAAATAGCCATGGGCGGCTGGAATCATTTTAACGTTTCCGCGCTTTTGGTGCACATGTTTCTTCCGCGT<br/> GGATAACCGTATACCGCTGGACCAAAAGCAAAACACCTTTCCGGTGTCTTTCTGGAATTTGGTACCAGGCTTTGGTCAAAAAAAGCCCGCACTGT<br/> CAGGTCGGGCTTTTTCTGTGTTTTCCAGCCAGGACAGTGCCTTGCAGAACTTCTGGGCGAAGAGCTACTCCCTCTGGGCGCTTAAAGTTCTTACTACTT<br/> CTAGAGAAATAGGAAGCTTCCGACCAAAAGCAAAACACCTTTCCGGTGTCTTTCTGGAATTTGGTACCAGGCTTTGGTCAAAAAAAGCCCGCACTGTCTA<br/> GGTGGGCTTTTTCTGTGTTTTCCGCTTAAACAGCGCAAGCTCAAGCAGGATGTTTACGCGGGCGCGCTCAAG</p>                                                                                                                                                                                                                                                                                                                                                                                                                                                                                                                                                                                                                                                                                                                                                                                                                                                                                                                                                                                                                                                                                                                                                                                                                                                                                                                                                                                                                                                                                                                                                                                                                                                                                                                                                                                                                                                                                                                                                                                                                                                                                                                                                                                                                                                                                                                                                                                                                                                                                                                                        |
| YJP_MK113_LP#1 | <p>AAAAAAACCCCGCTGTCAGGGCGGGGTTTTTTTTTTTTTTTTTTTTGGGTATAGCGTCTGGACAGTCATTCATCTTTCTGCCCTCCAAAAGCAAAACCCCGC<br/> CGAAGCGGGTTTTACGTAATCAGGTGAAACTGACCAGTAAGCCGGGACGACTGAGCAGTATGTCAGCGGTCGGGGGAGAAATCTCGCGTAGACACATACATGA<br/> GCTTACTTTGACAGCTCGTCCATGCCAGAGTGTATCCCGCGGCGTACGAAGTCCAGAGGACCATGTGATCGCGCTTCTCGTTGGGCTTTTGGTCAGGGCG<br/> GACTGGTAGCTAAGGTAGTGGTTGTCCGGCAGCAGCAGCGGGCGCTCCGGATTTGGGTGTTCTGCTGGTAGTGGTCGGCGAGCTGCACGCTCGGCTCCTCGATG<br/> TTGTGGCGGATCTTGAAGTTCACCTTTAGTCCCTTCTGCTTGTGCGGCATGATATAGACGTTGGTGTGGTAGTTACTCCAGCTTTGGCCCGAGGATG<br/> TTGCCCTCCTCCTTGAAGTCGATGCCCTTACGTCGATGGGTTTCCAGGGTGTGCGCTCGAACTTCACTTCGGGCGGGTTGTAGTTGCCGCTGCTCCTG<br/> AAGAAGATGGTGGCTCCTGGACGTAGCTTCCGGCATGGCGGACTTGAAGAAGTCTGCAGCTTCACTGTTGGTGGGCGGCGAGCAATGGCAGGCTAG<br/> CCGAGGTGGTCAGAGGTTGGCCAGGCGACGGCAGCTTCCCTGTGGTCAGATGAACCTCAGGTCAGCTTCCCGTAGTGGCAATCGCCCTCGCCCTCGCCG<br/> CACAGCTGAACCTTGGCGGTTACCTGCGCGTCCAGCTCGACAGGATGGCCACCCCGGTGAACAGCTTCCGCTTGTCTCACCATCTAGTATTTCTCC</p> <p><b>CTAGTATTTCTCC</b><br/> <b>CTTTCTCTAGTA</b>TTAAACAAAATTTTGTAGAGGCTGTTCTGCTCCTCAGGACTCATCAGACCGAAAGCACTCCGGTAGCAGCTTTGGATCCAAATGGTAC<br/> CTAGGACTGAGCTAGCTGCTCAATTTGGTCCAAATAGGCGAGGATAGGCTCCTCCTGGTCTTCCAGTACAATCTGCTCTGATGCCCTGAGTGGCGGCGCACTAGTGT<br/> CGACGGACTCGAATTCGATCCGAAAGTTCCTACTTTCTAGAGAAATAGGAATTCGAAATAGGAACTTCCGAAATAGGAACTTCTATTTTATAGTTTAAATGGT<br/> TCTGTAGACCAATGCCATTTGTTTATTTTCTAATAACATTCATAATATGTATCCGCTCATGAGACAATAACCTGATATAATGCTTCAATAATATTGAAAGAGGA<br/> GATATTAGCCATTTTCAACGGAAAGCTGCTGCTTAGCCGCGGATTAATTAACATGGATGCTGATTTATATGGTATAAATGGTATGATGATGATGATGATGATG<br/> GCAATCAGGTCGCACAATCATCGATGATGGAAGCCGCGATGCGCAGAGTGTCTTGAACACTGGCAAGGTAGGCTGCAAAATGATGATACAGATGAGAT<br/> GGTCAGACAATACTGGTGCAGGAAATTTATGCCCTTCCAGCATCAAGATTTATCCGTACTCTCAGTATGATGATGATGATGATGATGATGATGATGATGATG<br/> AACAGCATTCCAGGTATTAGAAGATATCCGATTCAGGTGAAATATTTGATGCGCTGCCAGTGTCTCGCGCGGTTCATTCGATTCCTGTTGTATTTG<br/> TCCTTTAAACAGCGCCCGTATTTCTGCTCGCTCAGCGCGCAATCAAGATGAATAACGGTTTGGTGGATGCGAGTATTGATGAGCGCGTAAATGATGGCC<br/> TGTTGAAACAAGTCTGGAAAGAAATGCATAAACTTTTGGCAATTTCCACCGGACTCAGTCTCAGCTCAGTCACTCATGATGATGATGATGATGATGATGATG<br/> GAAATTAATAGTTGATGATGATGATGATGATGATGATGATGATGATGATGATGATGATGATGATGATGATGATGATGATGATGATGATGATGATGATG<br/> GAAACGGCTTTTTCAAAAATATGGATGATAATCTGATGATAAATTTGAGTTCAGATGATGATGATGATGATGATGATGATGATGATGATGATGATGATG<br/> GATAGATCCAGTAACTGACCTCAGACTCCATCTGATTTGTTAGAACAGGCTCGGTTCCGGCGGGGCTTTTTTATGGTGAAGATCCAAGCAAGTTCACGTTAC<br/> TAAGCTCCTATGTTTAAAGCTTAAAGCTTGTGGCAACAAGCCAGGATGTAACGCCTGAGAAGCCCTTAGAGCTTCCAAAGCAATTTGGTGAACAGGAACT<br/> TAACCGCTGACATGGGAAATAGCCATGGGCGGCGGCAATGATTTTACGGTTCCTGGCTTTTGTGCTGCCCTTTGCTGCATGTTCTTCCGCGGCTAAAC<br/> GTATTACCGCTGGACAAAACGAAAAACACCTTTCCGGTGTCTTTTCTGGAATTTGGTACCAGGCTTTGGTCAAAAAAAGCCCGCACTGTCCAGTGGC<br/> CGCTTTTTCTGTGTTTTCCAGCCAGGACAGTGCCTTCCAGAACTTCCGCGGCGAAGAGCTACTCCCTTCCGCGGCTCCGAACTTCTACTTCTAGAGAA<br/> TAGGAATTCGGACCAAAACGAAAAACACCTTTCCGGTGTCTTTTCTGGAATTTGGTACCAGGCTTTGGTCAAAAAAAGCCCGCACTGTCCAGTGGC<br/> CTTTTTCTGTGTTTTCCGCTTAAACAGCGCAAGCTCAAGCAGGATGTTTACGCGGGCGCGCTCAAG</p>                                                                                                                                                                                                                                                                                                                                                                                                                           |
| YJP_MK114_LP#1 | <p>AAAAAAACCCCGCTGTCAGGGCGGGGTTTTTTTTTTTTTTTTTTTTGGGTATAGCGTCTGGACAGTCATTCATCTTTCTGCCCTCCAAAAGCAAAACCCCGC<br/> CGAAGCGGGTTTTACGTAATCAGGTGAAACTGACCAGTAAGCCGGGACGACTGAGCAGTATGTCAGCGGTCGGGGGAGAAATCTCGCGTAGACACATACATGA<br/> GCTTACTTTGACAGCTCGTCCATGCCAGAGTGTATCCCGCGGCGTACGAAGTCCAGAGGACCATGTGATCGCGCTTCTCGTTGGGCTTTTGGTCAGGGCG<br/> GACTGGTAGCTAAGGTAGTGGTTGTCCGGCAGCAGCAGCGGGCGCTCCGGATTTGGGTGTTCTGCTGGTAGTGGTCGGCGAGCTGCACGCTCGGCTCCTCGATG<br/> TTGTGGCGGATCTTGAAGTTCACCTTTAGTCCCTTCTGCTTGTGCGGCATGATATAGACGTTGGTGTGGTAGTTACTCCAGCTTTGGCCCGAGGATG<br/> TTGCCCTCCTCCTTGAAGTCGATGCCCTTACGTCGATGGGTTTCCAGGGTGTGCGCTCGAACTTCACTTCGGGCGGGTTGTAGTTGCCGCTGCTCCTG<br/> AAGAAGATGGTGGCTCCTGGACGTAGCTTCCGGCATGGCGGACTTGAAGAAGTCTGCAGCTTCACTGTTGGTGGGCGGCGGAGCAATGGCAGGCTAG<br/> CCGAGGTGGTCAGAGGTTGGCCAGGCGACGGCAGCTTCCCTGTGGTCAGATGAACCTCAGGTCAGCTTCCCGTAGTGGCAATCGCCCTCGCCCTCGCCG<br/> CACAGCTGAACCTTGGCGGTTTTACCTGCGCGTCCAGCTCGACCAGGATGGGACACCCCGGTGAACAGCTTCCGCTTGTCTCACCATCTAGTATTTCTCC<br/> <b>CTAGTATTTCTCC</b><br/> <b>CTTTCTCTAGTA</b>TTAAACAAAATTTTGTAGAGGCTGTTCTGCTCCTCAGGACTCATCAGACCGAAAGCACTCCGGTAGCAGCTTAGGCTTTTCAAGTCTGT<br/> GGAAAGCAGAAATGGTTACGCGAGCCGATCGGAAATTCCTCAGATAGCCCGCCAGATGAGGGGGATCAGAGCATGTCGCGGCAAAAGTTGTCGACCGGTTTTG<br/> CGATAACGACATCGCCAAAACAAAGACTGAAAGCGGAGGAGCACTTGAAGAATCGGACCCGCTTTTGAAGAGTTCGCGGCTCCGTTTGGACGCAAAAGGGT<br/> CTTTTGTGCTACCACTCCTGGCTCTCCAGTACAATCCTGCTGATGCCCTCGATGGCTGGCGCGCACTAGTGTCCAGCGGACTGCAATTCGATCCGAACTCG<br/> ACTTTCTAGAGAAATAGGAAGCTTCGAAATAGGAAGCTTCTATTTTATAGGTTAATGTCATGATAAATAGGTTTCTTAGACCATGAGGTTATTTGTTCTTAA<br/> ATACATTAATAATGATTCGCTCATGAGACAATAACCTGATAAATGCTTCAATAATTTGAAAAAGGAGATGAGGACCAATTTCAACGGAAAGCTGCTG<br/> CTAGCCCGGATAAATTTCAACATCGATGCTGATTTATATGGTATAAATGGCTCCGGATAATGTCGGCAAACTCAGTGCAGCAACTCTATCCTGATGATGG<br/> AAGCCCGATGCGCCAGAGTGTTTCTGAAACATGGCAAAGTAGGCTTGCATATGATGTACAGATGAGATGGTCAGACTAACTGGCTGACGGAATTTATGCC<br/> CTTCCGACCATCAAGCATTTTATCCGACTCCTGATGATGATGATGATGATGATGATGATGATGATGATGATGATGATGATGATGATGATGATGATGATGAT<br/> TCAGGTGAAAATATTGTTGATGCGCTGGCAGTTCTCCGCGCGGTTGCATTCGATTCCTGTTGTAATTTGCCTTTAAAGGTTTAAAGGTTTAAAGGTTTAAAGG<br/> CAGCCGCAATCAAGAAATGATAACGGTTGGTTGATGCGAGTGTATTTGATGACAGGCAATGATGGCTGGCCTGTGAAACAAGTCTGAAAGAAATGCAATAA<br/> CCGCAATCTTTTACGGTTCCGCTGCTCCTGCTCCTGCTCCTGCTCCTGCTCCTGCTCCTGCTCCTGCTCCTGCTCCTGCTCCTGCTCCTGCTCCTGCTCCT<br/> GGATCGCAGCGATACCGAGCTTTCGCAATCCTATCGAGAGCTGCTGGTGGTTTTCTCCTTCAATACAGAAAGCGGTTTTCAAAAATATGGTATGTGATAAT<br/> CCGATATGAAATAAATTTGAGCTTTCATTTGATGCTCGATGAGTTTTCTAAAGCTCCTTGGACTCCTGTTGATAGATCCAGTATTAACCTCAGACTTCCATCTG<br/> GATTTGTTAGAACGCTCGGTGCCCGGGGTTTTTATGGTGAGAAATCAAGCACAAGTTCAGTACTAAGCTCCTCATGTTTAACTGACTAAGCTCCTCATG<br/> TTTAAAGCACTAAACCTCATGGCTAAGCTACTAAGCTCCTCATGGCTAAGCTAAGCTCCTCATGTTTCCAGCTCAAGCTCCTCATGTTTGAACAATAAATAAT<br/> ATATAAATCAAGCAACTTAAATAGCCCTAAGGTTTAAAGTTTTATAAGAAAATAAAGAAATATAAAGCTTTTAAAGGTTTTAAAGGTTTTAAAGGTTTTAAAGG<br/> AAGCCAGGATGTAACGCACTGAGAAGCCCTTAGAGCCTCCTAAGCAAAATTTGATGACAGGAACTTAAAGCGTACATTAACGCTTAAAGGTTTTAAAGG<br/> CCGAAATCTTTTACGGTTCCGCTGCTCCTGCTCCTGCTCCTGCTCCTGCTCCTGCTCCTGCTCCTGCTCCTGCTCCTGCTCCTGCTCCTGCTCCTGCTCCT<br/> TTCCGGTGTCTTTCTGGAATTTGGTACCAGGCTTTGGTCAAAAAAAGCCCGCACTGTCCAGTGGGCGGTTTTTCTGTGTTTTCCAGCCAGGACAGTGT<br/> CTGCAGAACTTCCGCGGCGAAGACTTCCCTTCTGGCGCGTCCGAACTTCTTACTACTTCTTAGAGAAATAGGAAGCTTCCGCTTCTAGAGCTGACTGACTG<br/> TCCGGTGTCTTTCTGGAATTTGGTACCAGGCTTTGGTCAAAAAAAGCCCGCACTGTCCAGTGGGCGGTTTTTCTGTGTTTTCCGCTTAAACAGCGCAAG<br/> CTAAGCAGGATGTTGACGCGGGGCGCTCAAG</p> |
| YJP_MK115_LP#1 | <p>AAAAAAACCCCGCTGTCAGGGCGGGGTTTTTTTTTTTTTTTTTTTTGGGTATAGCGTCTGGACAGTCATTCATCTTTCTGCCCTCCAAAAGCAAAACCCCGC<br/> CGAAGCGGGTTTTACGTAATCAGGTGAAACTGACCAGTAAGCCGGGACGACTGAGCAGTATGTCAGCGGTCGGGGGAGAAATCTCGCGTAGACACATACATGA<br/> GCTTACTTTGACAGCTCGTCCATGCCAGAGTGTATCCCGCGGCGTACGAAGTCCAGAGGACCATGTGATCGCGCTTCTCGTTGGGCTTTTGGTCAGGGCG<br/> GACTGGTAGCTAAGGTAGTGGTTGTCCGGCAGCAGCAGCGGGCGCTCCGGATTTGGGTGTTCTGCTGGTAGTGGTCGGCGAGCTGCACGCTCGGCTCCTCGATG<br/> TTGTGGCGGATCTTGAAGTTCACCTTTAGTCCCTTCTGCTTGTGCGGCATGATATAGACGTTGGTGTGGTAGTTACTCCAGCTTTGGCCCGAGGATG<br/> TTGCCCTCCTCCTTGAAGTCGATGCCCTTACGTCGATGGGTTTCCAGGGTGTGCGCTCGAACTTCACTTCGGGCGGGTTGTAGTTGCCGCTGCTCCTG<br/> AAGAAGATGGTGGCTCCTGGACGTAGCTTCCGGCATGGCGGACTTGAAGAAGTCTGCAGCTTCACTGTTGGTGGGCGGCGGAGCAATGGCAGGCTAG<br/> CCGAGGTGGTCAGAGGTTGGCCAGGCGACGGCAGCTTCCCTGTGGTCAGATGAACCTCAGGTCAGCTTCCCGTAGTGGCAATCGCCCTCGCCCTCGCCG<br/> CACAGCTGAACCTTGGCGGTTTTACCTGCGCGTCCAGCTCGACCAGGATGGGACACCCCGGTGAACAGCTTCCGCTTGTCTCACCATCTAGTATTTCTCC<br/> <b>CTAGTATTTCTCC</b><br/> <b>CTTTCTCTAGTA</b>TTAAACAAAATTTTGTAGAGGCTGTTCTGCTCCTCAGGACTCATCAGACCGAAAGCACTCCGGTAGCAGCTTAGGCTTTTCAAGTCTGT<br/> GGAAAGCAGAAATGGTTACGCGAGCCGATCGGAAATTCCTCAGATAGCCCGCCAGATGAGGGGGATCAGAGCATGTCGCGGCAAAAGTTGTCGACCGGTTTTG<br/> CGATAACGACATCGCCAAAACAAAGACTGAAAGCGGAGGAGCACTTGAAGAATCGGACCCGCTTTTGAAGAGTTCGCGGCTCCGTTTGGACGCAAAAGGGT<br/> CTTTTGTGCTACCACTCCTGGCTCTCCAGTACAATCCTGCTGATGCCCTCGATGGCTGGCGCGCACTAGTGTCCAGCGGACTGCAATTCGATCCGAACTCG<br/> ACTTTCTAGAGAAATAGGAAGCTTCGAAATAGGAAGCTTCTATTTTATAGGTTAATGTCATGATAAATAGGTTTCTTAGACCATGAGGTTATTTGTTCTTAA<br/> ATACATTAATAATGATTCGCTCATGAGACAATAACCTGATAAATGCTTCAATAATTTGAAAAAGGAGATGAGGACCAATTTCAACGGAAAGCTGCTG<br/> CTAGCCCGGATAAATTTCAACATCGATGCTGATTTATATGGTATAAATGGCTCCGGATAATGTCGGCAAACTCAGTGCAGCAACTCTATCCTGATGATGG<br/> AAGCCCGATGCGCCAGAGTGTTTCTGAAACATGGCAAAGTAGGCTTGCATATGATGTACAGATGAGATGGTCAGACTAACTGGCTGACGGAATTTATGCC<br/> CTTCCGACCATCAAGCATTTTATCCGACTCCTGATGATGATGATGATGATGATGATGATGATGATGATGATGATGATGATGATGATGATGATGATGATGAT<br/> TCAGGTGAAAATATTGTTGATGCGCTGGCAGTTCTCCGCGCGGTTGCATTCGATTCCTGTTGTAATTTGCCTTTAAAGGTTTAAAGGTTTTAAAGGTTTTAAAG<br/> CAGCCGCAATCAAGAAATGATAACGGTTGGTTGATGCGAGTGTATTTGATGACAGGCAATGATGGCTGGCCTGTGAAACAAGTCTGAAAGAAATGCAATAA<br/> CCGCAATCTTTTACGGTTCCGCTGCTCCTGCTCCTGCTCCTGCTCCTGCTCCTGCTCCTGCTCCTGCTCCTGCTCCTGCTCCTGCTCCTGCTCCTGCTCCT<br/> GGATCGCAGCGATACCGAGCTTTCGCAATCCTATCGAGAGCTGCTGGTGGTTTTCTCCTTCAATACAGAAAGCGGTTTTCAAAAATATGGTATGTGATAAT<br/> CCGATATGAAATAAATTTGAGCTTTCATTTGATGCTCGATGAGTTTTCTAAAGCTCCTTGGACTCCTGTTGATAGATCCAGTATTAACCTCAGACTTCCATCTG<br/> GATTTGTTAGAACGCTCGGTGCCCGGGGTTTTTATGGTGAGAAATCAAGCACAAGTTCAGTACTAAGCTCCTCATGTTTAACTGACTAAGCTCCTCATG<br/> TTTAAAGCACTAAACCTCATGGCTAAGCTACTAAGCTCCTCATGGCTAAGCTAAGCTCCTCATGTTTCCAGCTCAAGCTCCTCATGTTTGAACAATAAATAAT<br/> ATATAAATCAAGCAACTTAAATAGCCCTAAGGTTTAAAGTTTTATAAGAAAATAAAGAAATATAAAGCTTTTAAAGGTTTTAAAGGTTTTAAAGGTTTTAAAG<br/> AAGCCAGGATGTAACGCACTGAGAAGCCCTTAGAGCCTCCTAAGCAAAATTTGATGACAGGAACTTAAAGCGTACATTAACGCTTAAAGGTTTTAAAGG<br/> CCGAAATCTTTTACGGTTCCGCTGCTCCTGCTCCTGCTCCTGCTCCTGCTCCTGCTCCTGCTCCTGCTCCTGCTCCTGCTCCTGCTCCTGCTCCTGCTCCT<br/> TTCCGGTGTCTTTCTGGAATTTGGTACCAGGCTTTGGTCAAAAAAAGCCCGCACTGTCCAGTGGGCGGTTTTTCTGTGTTTTCCAGCCAGGACAGTGT<br/> CTGCAGAACTTCCGCGGCGAAGACTTCCCTTCTGGCGCGTCCGAACTTCTTACTACTTCTTAGAGAAATAGGAAGCTTCCGCTTCTAGAGCTGACTGACTG<br/> TCCGGTGTCTTTCTGGAATTTGGTACCAGGCTTTGGTCAAAAAAAGCCCGCACTGTCCAGTGGGCGGTTTTTCTGTGTTTTCCGCTTAAACAGCGCAAG<br/> CTAAGCAGGATGTTGACGCGGGGCGCTCAAG</p> |

|                 |                                                                                                                                                                                                                                                                                                                                                                                                                                                                                                                                                                                                                                                                                                                                                                                                                                                                                                                                                                                                                                                                                                                                                                                                                                                                                                                            |
|-----------------|----------------------------------------------------------------------------------------------------------------------------------------------------------------------------------------------------------------------------------------------------------------------------------------------------------------------------------------------------------------------------------------------------------------------------------------------------------------------------------------------------------------------------------------------------------------------------------------------------------------------------------------------------------------------------------------------------------------------------------------------------------------------------------------------------------------------------------------------------------------------------------------------------------------------------------------------------------------------------------------------------------------------------------------------------------------------------------------------------------------------------------------------------------------------------------------------------------------------------------------------------------------------------------------------------------------------------|
|                 | <p>CACGCTACTAAGCTCTCATGTTTGAACAATAAAATTAATAATAATACGCAACTTAAATAGCCTCTAAGGTTTTAAGTTTTATAAGAAAAAAGAAATATAAAGCC<br/>TTTTAAAGCTTTTAAAGTTTAAACGGTTGTGGACAACAAGCCAGGATTAACACGACTGAGAAGCCCTTAGAGCCTCCAAAGCAATTTTGTAGTACACAGGAAATGA<br/>CTTAACCGCTGACATGGGAATTAGCCATGGGGCCGTGGGAATCATTTTACCGTTCTGGCCCTTTTGTCCGCTTTTGTCTCAGATGTTCTTCTCGGTGGATGA<br/>CCGTATTACCCTGGCAAAAACGAAAAACACCCCTTTCCGGGTCTTTTCTGGAATTTGGTACCGAGCCTTTGGTCGAAAAAAGAGCCCGCACTGTCAGGTG<br/>CGGGCTTTTCTGTGTTTCCAGCCAGAGCAGTGGCTTTCGGAAGTCTTCGGGGAGAGCTACTCCCTTTCGGCCGTCCGAAATTTCTATCTTTTCTAGAG<br/>AATAGGAATTTCCGACAAAACGAAAAACACCCCTTTCCGGGTCTTTTCTGGAATTTGGTACCGAGCCTTTGGTCGAAAAAAGAGCCCGCACTGTCAGGTGCG<br/>GGCTTTTCTGTGTTTCCCGTTAAACAGCCAGAACTCAAGCAGGATGTTTTCAGCCGGGGCGGCTCAAG</p>                                                                                                                                                                                                                                                                                                                                                                                                                                                                                                                                                                              |
| YJP_MKC254_LP#1 | <p>AAAAAACCAGCCCTGTCAGGGGGGGGTTTTTTTTTTTTTTTTTTTTTTTTTTTTGGGTATAGCGTCTGGACAGTCATTTCATCTTTCTGCCCCCAAAAGCAAAACCCGC<br/>CGAAGCGGTTTTTACGTAAATCAGGTGAAACTGACCGATAAGCCGGGACGAGCTGAGCAGTATGTCAGCGGTCGGGGAGAATCTCCGCTAGACACATACATGA<br/>GCTTACTGTACAGCTCTCCATGCCAGAGTATCCCGCCGGCGTCAAGACTCCAGCAGGACATGTATCCGCTTCTCGTTGGGTCTTTGCTCAGGCGC<br/>GACTGTAGTAAAGTAGTGTGTGTGGGCGAGCAGCAGGGGGCTGCGCATTTGGGTGTTCTGCTGGTAGTGTGGCGAGCTGCAGCTGCCCTCCGCTCAT<br/>TGTGGCGGATCTGAAGTTCACTTGTACCGCTTCTGCTTTGTCGGCCATGATATAGACGTTGTGGCTGTTGTAGTTGTACTCCAGCTTTGTGCCCAGGATG<br/>TTGCCCTCCTCTGAAGTCGATGCCCTTCACTGATGCGGTTTCCAGGTTGTCCGCTCGAATTCACCTCGGGGGGGTCTTGTAGTTGCCGTCTGCTTTG<br/>AAGAAGATGGTGGCTTCTGGACGTAGCCTTCCGGCATGGCGACTTGAAGAAGTCTGACGCTTCACTGTGGTGGGGTAGCGGGCAGGACTTCAGGCCGTAG<br/>CCGAGGTTGGTACGAGGTTGGCCAGGGCAGGGCAGCTTGCCTGGTGCAGATGAATTCAGGTCAGCTTCCCGTAGGTTGGCATCCGCTCCGCTCCGCC<br/>GACACGCTGAATTTGGCCGTTTACGTCGCGCTCCAGCTCGACAGGATGGGCACCCCGGTGAACAGCTCCCTCCGCTTGTCCACCATCTAGTATTTCTCC<br/>CTAGGACTGAGCTAGCTCTAAAGTTAGGACTATTCAGCTTCCACCGTACGAGTATGTTCTTCCAGTACAATGCTCTGATGCCCTCGATGCCGCGC<br/>ACTAGTGTCCAGGAGCTCGAATTCGGATCCGAAGTTCTTACTTTCTAGAGAAATGGAATTCGGACAAAACGAAAAACACCCCTTTCCGGGTGCTTTTCTG<br/>GAATTTGGTACCGAGCCTTTGGTCGAAAAAAGCCCGCACTGTCAGGTGCGGGCTTTTTCTGTGTTCCCGTTTAAACAGCCAGAACTCAAGCAGGATGTTG<br/>ACCGGGCGGCTCAAG</p> |
| YJP_MKC255_LP#1 | <p>AAAAAACCAGCCCTGTCAGGGGGGGGTTTTTTTTTTTTTTTTTTTTTTTTTTTTGGGTATAGCGTCTGGACAGTCATTTCATCTTTCTGCCCCCAAAAGCAAAACCCGC<br/>CGAAGCGGTTTTTACGTAAATCAGGTGAAACTGACCGATAAGCCGGGACGAGCTGAGCAGTATGTCAGCGGTCGGGGAGAATCTCCGCTAGACACATACATGA<br/>GCTTACTGTACAGCTCTCCATGCCAGAGTATCCCGCCGGCGTCAAGACTCCAGCAGGACATGTATCCGCTTCTCGTTGGGTCTTTGCTCAGGCGC<br/>GACTGTAGTAAAGTAGTGTGTGTGGGCGAGCAGCAGGGGGCTGCGCATTTGGGTGTTCTGCTGGTAGTGTGGCGAGCTGCAGCTGCCCTCCGCTCAT<br/>TGTGGCGGATCTGAAGTTCACTTGTACCGCTTCTGCTTTGTCGGCCATGATATAGACGTTGTGGCTGTTGTAGTTGTACTCCAGCTTTGTGCCCAGGATG<br/>TTGCCCTCCTCTGAAGTCGATGCCCTTCACTGATGCGGTTTCCAGGTTGTCCGCTCGAATTCACCTCGGGGGGGTCTTGTAGTTGCCGTCTGCTTTG<br/>AAGAAGATGGTGGCTTCTGGACGTAGCCTTCCGGCATGGCGACTTGAAGAAGTCTGACGCTTCACTGTGGTGGGGTAGCGGGCAGGACTTCAGGCCGTAG<br/>CCGAGGTTGGTACGAGGTTGGCCAGGGCAGGGCAGCTTGCCTGGTGCAGATGAATTCAGGTCAGCTTCCCGTAGGTTGGCATCCGCTCCGCTCCGCC<br/>CACAAGCTGAATTTGGCCGTTTACGTCGCGCTCCAGCTCGACAGGATGGGCACCCCGGTGAACAGCTCCCTCCGCTTGTCCACCATCTAGTATTTCTCC<br/>CTAGGACTGAGCTAGCTCTAAAGTTAGGACTATTCAGCTTCCACCGTACGAGTATGTTCTTCCAGTACAATGCTCTGATGCCCTCGATGCCGCGC<br/>ACTAGTGTCCAGGAGCTCGAATTCGGATCCGAAGTTCTTACTTTCTAGAGAAATGGAATTCGGACAAAACGAAAAACACCCCTTTCCGGGTGCTTTTCTG<br/>GAATTTGGTACCGAGCCTTTGGTCGAAAAAAGCCCGCACTGTCAGGTGCGGGCTTTTTCTGTGTTCCCGTTTAAACAGCCAGAACTCAAGCAGGATGTTG<br/>ACCGGGCGGCTCAAG</p> |
| YJP_MKC140_LP#1 | <p>AAAAAACCAGCCCTGTCAGGGGGGGGTTTTTTTTTTTTTTTTTTTTTTTTTTTTGGGTATAGCGTCTGGACAGTCATTTCATCTTTCTGCCCCCAAAAGCAAAACCCGC<br/>CGAAGCGGTTTTTACGTAAATCAGGTGAAACTGACCGATAAGCCGGGACGAGCTGAGCAGTATGTCAGCGGTCGGGGAGAATCTCCGCTAGACACATACATGA<br/>GCTTACTGTACAGCTCTCCATGCCAGAGTATCCCGCCGGCGTCAAGACTCCAGCAGGACATGTATCCGCTTCTCGTTGGGTCTTTGCTCAGGCGC<br/>GACTGTAGTAAAGTAGTGTGTGTGGGCGAGCAGCAGGGGGCTGCGCATTTGGGTGTTCTGCTGGTAGTGTGGCGAGCTGCAGCTGCCCTCCGCTCAT<br/>TGTGGCGGATCTGAAGTTCACTTGTACCGCTTCTGCTTTGTCGGCCATGATATAGACGTTGTGGCTGTTGTAGTTGTACTCCAGCTTTGTGCCCAGGATG<br/>TTGCCCTCCTCTGAAGTCGATGCCCTTCACTGATGCGGTTTCCAGGTTGTCCGCTCGAATTCACCTCGGGGGGGTCTTGTAGTTGCCGTCTGCTTTG<br/>AAGAAGATGGTGGCTTCTGGACGTAGCCTTCCGGCATGGCGACTTGAAGAAGTCTGACGCTTCACTGTGGTGGGGTAGCGGGCAGGACTTCAGGCCGTAG<br/>CCGAGGTTGGTACGAGGTTGGCCAGGGCAGGGCAGCTTGCCTGGTGCAGATGAATTCAGGTCAGCTTCCCGTAGGTTGGCATCCGCTCCGCTCCGCC<br/>CACAAGCTGAATTTGGCCGTTTACGTCGCGCTCCAGCTCGACAGGATGGGCACCCCGGTGAACAGCTCCCTCCGCTTGTCCACCATCTAGTATTTCTCC<br/>CTAGGACTGAGCTAGCTCTAAAGTTAGGACTATTCAGCTTCCACCGTACGAGTATGTTCTTCCAGTACAATGCTCTGATGCCCTCGATGCCGCGC<br/>ACTAGTGTCCAGGAGCTCGAATTCGGATCCGAAGTTCTTACTTTCTAGAGAAATGGAATTCGGACAAAACGAAAAACACCCCTTTCCGGGTGCTTTTCTG<br/>GAATTTGGTACCGAGCCTTTGGTCGAAAAAAGCCCGCACTGTCAGGTGCGGGCTTTTTCTGTGTTCCCGTTTAAACAGCCAGAACTCAAGCAGGATGTTG<br/>ACCGGGCGGCTCAAG</p> |
| YJP_MKC141_LP#1 | <p>AAAAAACCAGCCCTGTCAGGGGGGGGTTTTTTTTTTTTTTTTTTTTTTTTTTTTGGGTATAGCGTCTGGACAGTCATTTCATCTTTCTGCCCCCAAAAGCAAAACCCGC<br/>CGAAGCGGTTTTTACGTAAATCAGGTGAAACTGACCGATAAGCCGGGACGAGCTGAGCAGTATGTCAGCGGTCGGGGAGAATCTCCGCTAGACACATACATGA<br/>GCTTACTGTACAGCTCTCCATGCCAGAGTATCCCGCCGGCGTCAAGACTCCAGCAGGACATGTATCCGCTTCTCGTTGGGTCTTTGCTCAGGCGC<br/>GACTGTAGTAAAGTAGTGTGTGTGGGCGAGCAGCAGGGGGCTGCGCATTTGGGTGTTCTGCTGGTAGTGTGGCGAGCTGCAGCTGCCCTCCGCTCAT<br/>TGTGGCGGATCTGAAGTTCACTTGTACCGCTTCTGCTTTGTCGGCCATGATATAGACGTTGTGGCTGTTGTAGTTGTACTCCAGCTTTGTGCCCAGGATG<br/>TTGCCCTCCTCTGAAGTCGATGCCCTTCACTGATGCGGTTTCCAGGTTGTCCGCTCGAATTCACCTCGGGGGGGTCTTGTAGTTGCCGTCTGCTTTG<br/>AAGAAGATGGTGGCTTCTGGACGTAGCCTTCCGGCATGGCGACTTGAAGAAGTCTGACGCTTCACTGTGGTGGGGTAGCGGGCAGGACTTCAGGCCGTAG<br/>CCGAGGTTGGTACGAGGTTGGCCAGGGCAGGGCAGCTTGCCTGGTGCAGATGAATTCAGGTCAGCTTCCCGTAGGTTGGCATCCGCTCCGCTCCGCC<br/>CACAAGCTGAATTTGGCCGTTTACGTCGCGCTCCAGCTCGACAGGATGGGCACCCCGGTGAACAGCTCCCTCCGCTTGTCCACCATCTAGTATTTCTCC<br/>CTAGGACTGAGCTAGCTCTAAAGTTAGGACTATTCAGCTTCCACCGTACGAGTATGTTCTTCCAGTACAATGCTCTGATGCCCTCGATGCCGCGC<br/>ACTAGTGTCCAGGAGCTCGAATTCGGATCCGAAGTTCTTACTTTCTAGAGAAATGGAATTCGGACAAAACGAAAAACACCCCTTTCCGGGTGCTTTTCTG<br/>GAATTTGGTACCGAGCCTTTGGTCGAAAAAAGCCCGCACTGTCAGGTGCGGGCTTTTTCTGTGTTCCCGTTTAAACAGCCAGAACTCAAGCAGGATGTTG<br/>ACCGGGCGGCTCAAG</p> |

|                 |                                                                                                                                                                                                                                                                                                                                                                                                                                                                                                                                                                                                                                                                                                                                                                                                                                                                                                                                                                                                                                                                                                                                                                                                                                                                                                                                                                                                                                                                                                                                                                                                                                                                                                                                                                                                                                                                                                                                                                                                                                                                                                                                                                                                                                                                                                                                                                                                                                                                                                                                                                                                                                                                                                                                                                                                                                                                                                                                                                                                                                                                                                                                                                                                                                                                                                                                                  |
|-----------------|--------------------------------------------------------------------------------------------------------------------------------------------------------------------------------------------------------------------------------------------------------------------------------------------------------------------------------------------------------------------------------------------------------------------------------------------------------------------------------------------------------------------------------------------------------------------------------------------------------------------------------------------------------------------------------------------------------------------------------------------------------------------------------------------------------------------------------------------------------------------------------------------------------------------------------------------------------------------------------------------------------------------------------------------------------------------------------------------------------------------------------------------------------------------------------------------------------------------------------------------------------------------------------------------------------------------------------------------------------------------------------------------------------------------------------------------------------------------------------------------------------------------------------------------------------------------------------------------------------------------------------------------------------------------------------------------------------------------------------------------------------------------------------------------------------------------------------------------------------------------------------------------------------------------------------------------------------------------------------------------------------------------------------------------------------------------------------------------------------------------------------------------------------------------------------------------------------------------------------------------------------------------------------------------------------------------------------------------------------------------------------------------------------------------------------------------------------------------------------------------------------------------------------------------------------------------------------------------------------------------------------------------------------------------------------------------------------------------------------------------------------------------------------------------------------------------------------------------------------------------------------------------------------------------------------------------------------------------------------------------------------------------------------------------------------------------------------------------------------------------------------------------------------------------------------------------------------------------------------------------------------------------------------------------------------------------------------------------------|
|                 | <p>CCGACTGTCAGGTGGCGGGCTTTTCTGTGTTTCCAGCCAAAGAGCAGTGCCTTGCAGAAGTTCTCGGGCGAAGAGCTACTCCCTTTGCGCCGTCGGGAAAGTTCC<br/>CTATCTTTTAGAGAAATAGGAAGCTTCGGACCAAAACGAAAAACACCCCTTTCGGGTGCTTTCTTGGAAATTTGGTAGGACCTTTGTCGAAAAAAAAACC<br/>CGACTGTCAGGTGGCGGGCTTTTCTGTGTTTCCGCTTAACAGCCGAACTCAACAGGATGTTTACGCCGGGGGGCTCAAG</p>                                                                                                                                                                                                                                                                                                                                                                                                                                                                                                                                                                                                                                                                                                                                                                                                                                                                                                                                                                                                                                                                                                                                                                                                                                                                                                                                                                                                                                                                                                                                                                                                                                                                                                                                                                                                                                                                                                                                                                                                                                                                                                                                                                                                                                                                                                                                                                                                                                                                                                                                                                                                                                                                                                                                                                                                                                                                                                                                                                                                                                    |
| YJP_MKC142_LP#1 | <p>AAAAAACCCCGCCTGTCAGGGCGGGGTTTTTTTTTCTTGGGTATAGCGTCTGGACAGTCATCATCTTTTCGCCCTCCAAAAGCAAAAACCCGCG<br/>CGAAGCGGGTTTTACGTAAATCAGGTGAACTGACCGGATAGCCGGAGGAGTTCGAGCATGTCGAGCGTTCGGGAGGAAATTTCCACGGGATAGACACATACATGA<br/>GCAGCGGGAGAAAAGTTCGAAAATTCGGACCCGATGGAAATGGATAAAAGGCGCCCTGTGAAATTCGAGGGCCCTGTTACGAGCAATATTATTGCATCTG<br/>CCGTGTAAATCAGTTCAGGGTTTTTCAACACGATCTGCAGCGGCGGTGCACCCAGAACTGCCAGCTTCCAGCATATTGCGGTTATTCGGGTTTCGGCGACTG<br/>TATCTGCCTCAGCGGACTCGGAATTTTACCATTATGCGAGCATTTCAATACGCTCATTGTAATATGAACCGCAGTCTTGCACGGGATCATACCACAA<br/>TTCCGGTTGCCAGATCAGAAAACATTGGTCAGTGTTCACGCTGGCTATGATAATCTGCAAAATTTCCGTACCACAACTGGCAGCTGTACAGACGACAA<br/>CATTCATTTGGTGTACGACGACGAACTTCGCTTGCACAAATTTGCCACGAGCCATTTCCGGACCTGCATCCAGGTCCTCAGATCTCTCCGCAAGCCG<br/>TGCTCGGTTCAACGGTGTCTTTCAGCAGGGTCAGAAAGATTTCGGTTTGTCCGGAAATGATAACAGCTTGCCTGACGAAATCAACACTGCATCTGCAATC<br/>GATGGGTACTGGTGTTCAAAACCTGACGGGTAAACAGTTCGCGCTGCATCCGAAATTTCTTCACGGGATTTTACCTGACAGCGGGGTGCCTACGAC<br/>CGGGACGCAACTGCGCTGCCATCTAGTAACCTCTTTCGCTGATTATAGGGAACATTTTAAACAAAATTTTGTAGAGGGGTGTTCGTCTTCGGAAGTCA<br/>TCAGTCAAGGTACGCACCTTGAGACACCTTAATTGTGAGCGCTCACAAATTCACACATATACAGAGCCGATTAATTGTCACACAGCCAACCATGTTGCA<br/>TGGCTTCCAGTACAATCTGCTCTGATGCCCTCGAGTCCCGCGCCACTAGTGTGCAGCGGAGCTCGAATTCGGATCCGAAGTTCCCTACTTTCTAGAGAAATGGA<br/>ACTTCGGAATAGGAATCTTATTTTTATAGTTTAAATGCATGATAATAATGGTTCCTAGACCATGCCTATTGTTTATTTTCTAAATACATTCAAATATGTAT<br/>CCCTCATGAGCAATTAACCTGATAAATGCTTCAATTAATTAAGAAAGGAGAGTATGAGCCATATTCACGGGAAAGCTGTGCTGATGCGGCATTAAT<br/>TCCACATGGATGCTGATTTATATGGGTATAAATGGGCTCCGATAATGCTCGGCAATCAGTTCGCAATCTATGCTGTAGTCCGAACCGGATGTCGCAAG<br/>TTGTTTCTGAAAATGGCAAGGTAGCGTTGCCAATGATGTTACAGATGAGATGTCAGACTAACTGGCTGACGAAATTTATGCCTCTCCGACCATCAAGCAT<br/>TTTATCCGTTACTCTGATGATGCAATGTTTCTCACCTCGCATCCCGGGAAAACAGCATTTCCAGGTATTAGAGAAATATCTGATTCAGGTGAAAATATTTGT<br/>GATCGCTGGCAGTGTTCCTCGCCCGGTTGCATTCGATCTTCCTTGAATTCCTTTAAGCAGCCCGCTTTTAAACAGCAGCCGCTATTCAGTAACTCAGGAA<br/>ATAACCGTTTGGTTGATGCGAGGATTTGATGACGAGGTAATGGCTGGCTTGTGAACAGCTCGAAAGAAATGCATAAATTTTCGGCCTCCACCGGAT<br/>TCAGCTGCATCAGTGTGATTTCTCACTGATAACCTTATTTTCGACGAGGAAATTAATAGTTGTATTGATGTTCGACGAGTTCGAACTCGACGACATAC<br/>CAGGATCTCCATCCTATGGAAGTGCCTCGGTGAGTTTTCTCCTTCATTACAGAAAAGGGCTTTTCAAAAATATGGTATGATAATCCTGATGATAAATTT<br/>CACTTCATTTGATGCTCGATGAGTTTTCTAAAGCTCGCTTGACTCCTGTTGATAGATCCAGTAAATGACCTCAGAACTCCATCTGATTGTTGTCAGAACCTC<br/>GGTTGCCCGGGGCTTTTTTTTATGGTGAAGATCCAGCAAGAAAGATCCGCCCAGATCGCTCGGGCTGAGAGATCTGAAGTACGAGTTCAACTGTTGA<br/>TAGTACTACTAAGCTCTCATGTTTTCAAGTACTAAGCTCTCATGTTTAAAGTACTAAGCTCTCATGTTTAAACGAAATAAATAATAATAATAATAATAATA<br/>TCATGGCTAAAGCTCTCATGTTTTCAAGTACTAAGCTCTCATGTTTAAACGAAATAAATAATAATAATAATAATAATAATAATAATAATAATAATAATA<br/>TTTTATAAGAAAAGAAATATAATAAGGCTTTTAAAGCTTTTAAAGGTTTAAAGGTTTAAAGGTTTAAAGGTTTAAAGGTTTAAAGGTTTAAAGGTTT<br/>CTAAAGCAATTTGAGTGACACAGAACTTAACCGCTGCATGGGAATAGCCATGGCCCGTGCGAATCAATTTTACGGTTCCTGGCTTTGGCTTTGCT<br/>TTGCTCAGATGTTTCCTCGCTGGATAACCGTATTACCGCTGACCAAAACGAAAAACCCCTTTCGGGTGCTTTTCTGAAATTTGGTACAGCGCTTTG<br/>GTCGAAAAAAAAGCCCGACTGTCAGGTGCGGGCTTTTTTCTGTTTCCAGCCAAAGAGCAGTGCCTTGCAGAAAGTTCGGGCGAAGGACTCTCCCTTCTG<br/>CGCCGTCGAAAGTTTCTTACTTTCTAGAGAAATAGGAAGTTCGGCAAAAACGAAAAACCCCTTTCGGGTGCTTTTCTGAAATTTGGTACCGAGCTTTGGT<br/>CGAAAAAAAAGCCCGACTGTCAGGTGCGGGCTTTTTTCTGTTTCCGCTTAACAGCCGAGAACTCAACAGGATGTTTACGCCGGGGCGCTCAAG</p> |
| YJP_MKC146_LP#1 | <p>AAAAAACCCCGCCTGTCAGGGCGGGGTTTTTTTTTCTTGGGTATAGCGTCTGGACAGTCATCATCTTTTCGCCCTCCAAAAGCAAAAACCCGCG<br/>CGAAGCGGGTTTTACGTAAATCAGGTGAACTGACCGGATAGCCGGAGGAGTTCGAGCATGTCGAGCGTTCGGGAGGAAATTTCCACGGGATAGACACATACATGA<br/>GCAGCGATAAAAGTTCGCGCGATGGCGGGCTTTTTCACTGTGTCATAGGATAAAAGGCGCATCTCGCAGCCCTTTTTTTAAATGTTTAAATTTGCG<br/>CAGCGGATACGACAGCTGATCAATCAGATCAACAGCTGCATCAACAGGGTGGCAGATACCAGATATCTTCTGTGAATAAGACCGGATGAATAACCGT<br/>GGTCAGTGCATGAGAAACGGTTTTCGCGCAAGCCGGAATATCGTTGCAATATACAGACTGCTTCAACACCATCAAGAAATTTTCGCGCAGCTTTTGGAAAT<br/>CAGCTTTGTAATTAATCGCCATTTCAATCTCTTTGCGCGTCTCAGCATTTGAATAAACCCTGATGTTTGAATGATCTGATGATCCTGTTCCAT<br/>CAGATTACGTGCCAGATGACGACAGCAGTCCAGCGGTGCATGGCTTTTACCAGCGCAAACTGCAAGTTCAAAAACCAATCTGCAGCAAAACCAATTCATC<br/>AACAGTGGTTTTTGCTGTAATAATTTTAAACATTTTCGGGACTCATATTTCAAGTCCGCTTGCATATCTGAAACGCAACTGCATTAACAAACCAAGTTCACG<br/>AACAGTTCTTCGCTTTTCCAGAAATACAGAGCGGTTTCTTCGGCACTAGCAGCGGACGACGCAACCGCAAGTCCGTTTACATCACTTTCCAGCAC<br/>CTCATCAATGGTTTTGTTCTATCTAGTCTGCTTGAACATAGCGGTA<br/>TAAACAAAATTTATTTGATGAGGGTTCCTGACTCATA<br/>GAGTTGAAGCACATCACTGACCCCTAATTTGTAGGCGCTCACAATTCACACATATACAGCGCATGATAATTGCAACAGCCCAACAGCTGATTCTCTCGG<br/>TTTTCCAGTACAATCTGCTGTGATGCCCTCGAGTGGCGGCGACTAGTGTGACAGGACTCGAATTCGGATCGAAGTCCCTACTTTCTAGAGAAATAGGAAGT<br/>TCGGAATAGGAATCTTATTTTTATAGTTAAATGTCATGATAATAATGGTTCTTAGACCATGCCTATTGTTTATTTTTCTAAATACATTCAAATATGATCCG<br/>CTCATGAGACAAATACCTGATAAATGCTTCAATTAATTTGAAAAGGAAAGATGAGCCATATTCACGGGAAAGCTGTGCTCTAGCCGGCAGATTAATTTCC<br/>AACTAGGATGCTGATTATATGGGTATAAATGGGCTCCGATAAATGTCGGGCAATCAGGTGCAGAACTCATGATTTGATGGAAGCCGATGCGGACAGATTTG<br/>TTTTGAAAACATGGCAAGGTAGCTTTGCCAATGATGTTACAGATGAGATGGTCAGACTAAATCGGTCAGCGAAATTTATGCTCTTCCAGCACATCAAGATTTT<br/>ATCCGTAATCTCTGATGATGATGTTTCTCACCACGCTGCGATCCCGGGAAACAGCATTCCAGGATTAAGAAGAAATTCCTGTTCCGTAACGAGTATTGTTGAT<br/>CCGCTGGCAGTGTTCCTCGCGCGGTTGCATTCGATTCCTGTTGATGTTTAAAGCAGCGCGGCTATTTCGCTCCTGCAGCGGCAATCCGAATGAAT<br/>AACGGTTTGGTTGATGCGAGTATTGTTGATGAGGCGTAATGGCTGGCTTGTGAACAAGTCTGGAAAGAAATGCAAACTTTGCAATCTCAGCAGATFCAG<br/>TCGCTCACTCATGGTATTCTCACTGATAACCTTATTTTACGAGGGAAATTAATAGTTGTTGATGTTGACGAGTCCGGAATCGCAGCAGCATACACAG<br/>GATCTCCATCTATGAACTCCTCGTGGTGGTTTTCCCTTCATTACAGCAAGCGCTTTTTCAAAAATATGGTATGTAATCGATGATAAATTTGCAG<br/>TTTTATTGATGCTCGATGAGTTTTCTAAAGCTCGCTTGACTCCTGTTGATAGATCCAGTAAATGACCTCAGAACTCCATCTGATTGTTGACAGACTCGGT<br/>TGCCCGCGGGGCTTTTTTATGGTGAAGATCCAGCAAGAAAGATCCGGCCAGATGCTCCTCGCGGTAGAGATCTGAAAGTACGAGTTCACTCTGATGATG<br/>TAGCTACTAAGCTCTCATGTTTTCAAGTACTAAGCTCTCATGTTTAAAGTACTAAGCTCTCATGTTTTAAGCAATAAATAATAATAATAATAATAATAATA<br/>TGCTTAAAGCTACTAAGCTCTCATGTTTTCAAGTACTAAGCTCTCATGTTTTAAGCAATAAATAATAATAATAATAATAATAATAATAATAATAATAATA<br/>TATAGAAAAAAGAAATATAATAAGGCTTTTAAAGCTTTTAAAGGTTTAAAGGTTTAAAGGTTTAAAGGTTTAAAGGTTTAAAGGTTTAAAGGTTTAAAG<br/>AAAGCAATTTGAGTGACACAGGAACACTTAACCGCTGCATGGGAATAGCCATGGCCCGTGCGAATCAATTTTACGGTTCCTGGCTTTGGCTTTGCT<br/>CTCAATGTTCTTTCGCTGGTGGATAACCGTATTCCGCCCTGGACCAAAACGAAAAACCCCTTTCGGGTGCTTTTCTGAAATTTGGTACAGGCTTTGTTGC<br/>GAAAAAAAAGCCCGACTGTCAGGTGCGGGCTTTTTTCTGTTTCCAGCCAAAGAGCAGTGCCTTGCAGAAAGTTCTCGGGCGAAGAGCTACTCCCTTCTGCGC<br/>CTCGCAAGTTCTTACTTTCTAGAGAAATAGGAAGTTCGGCAAAAACGAAAAACCCCTTTCGGGTGCTTTTTCTGAAATTTGGTACCGAGCTTTGGTGG<br/>AAAAAAAAGCCCGACTGTCAGGTGCGGGCTTTTTTCTGTTTCCGCTTAACAGCCGAGAACTCAACAGGATGTTTACGCCGGGGCGCTCAAG</p>          |
| YJP_MKC149_LP#1 | <p>AAAAAACCCCGCCTGTCAGGGCGGGGTTTTTTTTTCTTGGGTATAGCGTCTGGACAGTCATCATCTTTTCGCCCTCCAAAAGCAAAAACCCGCG<br/>CGAAGCGGGTTTTACGTAAATCAGGTGAACTGACCGGATAGCCGGAGGAGTTCGAGCATGTCGAGCGTTCGGGAGGAAATTTCCACGGGATAGACACATACATGA<br/>GCAGCGAAAAGAGGTGGCGAGGGGATCACTGGCAGATGCTGCCATAAATAAAAGGCGGAAATCCGCGCTTTTTGACGCTTTTAGCTCTGACCGCTCAGCTGT<br/>CGCCACAGGCTTTCTTCAACACCGTTCAGAGTTCATCGCTGAGCTCAGATAATCGTTCATCATTCTGCATCTTTCAACACTTCCATAAAGCTGCACAAATTCGCA<br/>ATCAGTGCATTTTCCGGCAGATACGAATCAACCTGTTTCTGACTTCAGAAAAAGGTGCACACAAATTCACCGATTCTGATAGCCAGCGGTTCCT<br/>TCGGTCAGAAAGTTCGCTGCTGATGGTTTTATGAAAACCAAGTGCACCGGATGATTTTGGTAAAGGTCCACATCTTCAAAAATGTGATGAAGCCATCA<br/>CGATAAACCATCAGTTTCATTTGCGCAGCCCGCTTCAATCACTGAGAAATTTCAATAACATGCTGCTGAAACAGTTCCTTCCAGCGGCTTTTCTTTGTTGTA<br/>TAGGATAAATGGTGCCTGCACCAACTTTTGCATTTTCTGCAATCATCGCATGTTGGTGCATCAAAACCAGCTTTCGAAACAGCAGCAGGCTTGCCTGAAA<br/>ATTGCTTCTGTTTTGCTCGGGGTGCTTTCCATCTCCCGCCTCGTTTTGTTAAACAAAATTTATTTGAGAGGACTGTTTTCGCCCTTTTGCGCCATCTGCAAGT<br/>CGGATACATCTCGGGCAGCTTAATTGTGAGCGCTCACAAATTCACACATATACAGAGCGGATTAATTGTCACACAGCCAAAGTTCCTCTGCTGTTG<br/>TCCAGTACAATCTGCTCTGATGCCCTCGAGTGGCGGCACACTAGTGTGACGAGGCTCGAATTCGGATCCGAAGTTCCCTACTTTCTAGAGAAATAGGAAGTTCG<br/>GAATAGCAATCTCATTTTTATAGTTTAAATCTCATGATAAATAGTTCCTTAGACCATGCTATTTGTTTATTTTCTAAATACATTCAAATATGATCCGCTC<br/>ATGAGACAATAACCTGATAAATGCTTCAATTAATTTGAAAAGGAAAGATGAGCCATATTCACGGGAAAGCTGTGCTCTAGCCGGGATTAATTTCCAA<br/>ATGATGCTGATTTATATGGGTATAAATGGGCTCCGATAAATGTCGGGCAATCAGGTGCAGAACTCATGATTTGATGGAAGCCGATGCGGACAGATTTGT<br/>CTGAAACATGGCAAGGTAGCCTGCCAATGATGTTACAGATGAGATGGTCAGACTAACTGCTCAGCGAAATTTATGCTCTTCCAGCACATCAAGCATTTTATC<br/>CTGATCTCTGATGATGATGTTTACTCACCACTGGATTCGCCGAAACAGATATCCAGTATTAGAAAGAAATTCCTGATTCAGGTGAAATATTTGTTGATCGC<br/>CTGGCAGTGTCTCGCGCGGTTGCATTCGATTCCTGTTGATGTTTCCTTTAAACAGCGCCGCTATTTCGCTCCTGCAGCGGCAATCCAGAAATGAAT<br/>GGTTTGGTTGATGCGAGTATTGTTGATGACGAGCGTAAATGGCTGGCTTGTGAACAAGTCTGGAAAGAAATGCAAACTTTTGCATCTTCCAGGATCTCAGC<br/>GCACTCATGCTGATTTCTCACTGATAACCTTATTTGACAGGGGAAATTAATAGTTGTTGATGTTGACGAGTCCGGAATCGCAGCAGCATACAGAGAT<br/>CTTGCCATCTTATGGAACGCTCGGTGAGTTTTCTCTTCATTACGAAAAGCGCTTTTTCAAAAATATGATTAATGATAATGATAAATTTGCAAGTTT<br/>CTTTGATGCTCGATGAGTTTTCTAAAGCTTCGCTTGACTCCTGTTGATAGATCCAGTAAATGACCTCAGAACTCCATCTGATTGTTTTCAGAAAATCTGGTTG<br/>CGCCGGGCTTTTTTATGGTGAAGATCCAGCAAGAAAGATCCGGCCAGATGCTCCTCGCGGTAGAGATGTGAAGTACGAGTTCACTCTGATGATGATGATC<br/>GCTACTAAGCTCTCATGTTTTCAAGTACTAAGCTCTCATGTTTAAAGTACTAAGCTCTCATGTTTAAACGAACTAAACCCCTGCTAGCTTACGCTACTGCTC<br/>CTAAGCTACTAAGCTCTCATGTTTTCAAGTACTAAGCTCTCATGTTTTAAGCAATAAATAATAATAATAATAATAATAATAATAATAATAATAATAATA<br/>AGAAAAAAGAAATATAATAAGGCTTTTAAAGCTTTTAAAGGTTTAAAGGTTTAAAGGTTTAAAGGTTTAAAGGTTTAAAGGTTTAAAGGTTTAAAG<br/>GCAATTTGAGTGACACAGGAACACTTAACCGCTGCATGGGAATAGCCATGGCCCGTGCGAATCAATTTTACGGTTCCTGGCTTTGGCTTTGCTG<br/>ACTGTTCTTTCGCTGGTGAATACCGTATTACCCTGGCAAAAACCCCTTTCGGGTGCTTTTCTGAAATTTGGTACCGAGCTTTGGTACGAGCTTTGGTGC<br/>AAAAAAGCCCGACTGTCAGGTGCGGGCTTTTTTCTGTTTCCAGCCAAAGAGCAGTGCCTTGCAGAAAGTTCGGGCGAAGAGCTACTCCCTTCTGCGCG</p>                                                                                                                                                                                                                                                                                                    |























**Appendix Table 8: Strains used in this study**

| Strain Name | Plasmid Integrated                                        | Related figure         | Marker removal |
|-------------|-----------------------------------------------------------|------------------------|----------------|
| YJP_DHC404  | plYJP019                                                  | Fig 1b                 | N              |
| YJP_MKC172  | Landing pad DNA, plYJP072                                 | Fig 1c                 | N              |
| YJP_MKC173  | Landing pad DNA, plYJP072                                 | Fig 1c, Fig 5          | Y              |
| YJP_MKC174  | plYJP064-Sensor                                           | Fig 2c, Appendix Fig 5 | N              |
| YJP_MKC108  | plYJP064-Sensor, plYJP067-PTac                            | Fig 2c, Appendix Fig 5 | N              |
| YJP_MKC110  | plYJP064-Sensor, plYJP067-PBadmc                          | Fig 2c, Appendix Fig 5 | N              |
| YJP_MKC111  | plYJP064-Sensor, plYJP067-PTet                            | Fig 2c, Appendix Fig 5 | N              |
| YJP_MKC112  | plYJP064-Sensor, plYJP067-PCymRC                          | Fig 2c, Appendix Fig 5 | N              |
| YJP_MKC113  | plYJP064-Sensor, plYJP067-PVanCC                          | Fig 2c, Appendix Fig 5 | N              |
| YJP_MKC114  | plYJP064-Sensor, plYJP067-PCinR                           | Fig 2c, Appendix Fig 5 | N              |
| YJP_MKC115  | plYJP064-Sensor, plYJP067-PTtg                            | Fig 2c, Appendix Fig 5 | N              |
| YJP_MKC254  | plYJP067-PJ23101H                                         | Fig 2a, 2b             | Y              |
| YJP_MKC255  | plYJP067-PJ23101L                                         | Appendix Fig 4         | Y              |
| YJP_MKC140  | plYJP064-Sensor, plYJP066-P3-PhIF, plYJP070-PPhIF         | Appendix Fig 7         | N              |
| YJP_MKC141  | plYJP064-Sensor, plYJP066-Q1-QacR, plYJP070-PQacR         | Fig 2d                 | N              |
| YJP_MKC142  | plYJP064-Sensor, plYJP066-A1-AmtR, plYJP070-PAmtR         | Fig 2d                 | N              |
| YJP_MKC146  | plYJP064-Sensor, plYJP066-F1-AmeR, plYJP070-PAmeR         | Appendix Fig 7         | N              |
| YJP_MKC149  | plYJP064-Sensor, plYJP066-B3-BM3R1, plYJP070-PBM3R1       | Fig 2d                 | N              |
| YJP_MKC154  | plYJP064-Sensor, plYJP066-F1-AmeRs, plYJP070-PAmeR        | Fig 2d                 | N              |
| YJP_MKC155  | plYJP064-Sensor, plYJP066-E0-BetI, plYJP070-PBetI         | Appendix Fig 7         | N              |
| YJP_MKC156  | plYJP064-Sensor, plYJP066-P1-PhIF, plYJP070-PPhIF         | Fig 2d                 | N              |
| YJP_MKC158  | plYJP064-Sensor, plYJP066-E1-BetI, plYJP070-PBetI         | Fig 2d                 | N              |
| YJP_MKC258  | plYJP064-Sensor, plYJP066-NOR-Tandem, plYJP070-PPhIF      | Fig 3a, 3c             | N              |
| YJP_MKC259  | plYJP064-Sensor, plYJP066-NOR-Split, plYJP070-NOR-Split   | Fig 3b, 3c             | N              |
| YJP_MKC260  | plYJP064-Sensor, plYJP066-AND-Tandem, plYJP070-PPhIF      | Fig 3d, 3f             | Y              |
| YJP_MKC261  | plYJP064-Sensor, plYJP066-Ox08-Tandem, plYJP070-PPhIF     | Fig 3f, Appendix Fig 9 | Y              |
| YJP_MKC262  | plYJP064-Sensor, plYJP066-AND-Split, plYJP070-AND-Split   | Fig 3e, 4              | Y              |
| YJP_MKC263  | plYJP064-Sensor, plYJP066-XNOR-Split, plYJP070-XNOR-Split | Fig 4                  | Y              |
| YJP_MKC264  | plYJP064-Sensor, plYJP066-Ox08-Split, plYJP070-Ox08-Split | Fig 4                  | Y              |
| YJP_MKC265  | plYJP064-Sensor, plYJP066-Ox0B-Split, plYJP070-Ox0B-Split | Fig 4                  | Y              |
| YJP_MKC266  | plYJP064-Sensor, plYJP066-OxF1-Split, plYJP070-OxF1-Split | Fig 4                  | Y              |
| YJP_MKC267  | plYJP064-Sensor, plYJP066-OxF1-Split, plYJP070-OxF1-Split | Fig 5                  | N              |



## References

- 1 Shin, J., Zhang, S., Der, B. S., Nielsen, A. A. & Voigt, C. A. Programming *Escherichia coli* to function as a digital display. *Mol Syst Biol* **16**, e9401, doi:10.15252/msb.20199401 (2020).
